1 **The N-terminal subunit of vitellogenin in planthopper eggs and saliva**  
2 **acts as a reliable elicitor that induces defenses in rice**

3

4 Jiamei Zeng<sup>1</sup>†, Wenfeng Ye<sup>1,2</sup>†, Wenhui Hu<sup>1</sup>, Xiaochen Jin<sup>1</sup>, Peng Kuai<sup>1</sup>,  
5 Wenhan Xiao<sup>1</sup>, Yukun Jian<sup>1</sup>, Ted C. J. Turlings<sup>2\*</sup>, Yonggen Lou<sup>1\*</sup>

6 <sup>1</sup>State Key Laboratory of Rice Biology & Ministry of Agriculture Key Lab of  
7 Molecular Biology of Crop Pathogens and Insects, Institute of Insect Sciences,  
8 Zhejiang University, Hangzhou 310058, China

9 <sup>2</sup>Laboratory of Fundamental and Applied Research in Chemical Ecology,  
10 Institute of Biology, University of Neuchâtel, Neuchâtel 2000, Switzerland

11 † These authors contributed equally to this work.

12 \*Corresponding authors: Ted C. J. Turlings, Yonggen Lou

13 **Email:** [ted.turlings@unine.ch](mailto:ted.turlings@unine.ch) (TT); [yglou@zju.edu.cn](mailto:yglou@zju.edu.cn) (Y.L.)

14

15 **Abstract**

16 Vitellogenins are essential for the development and fecundity of insects, but  
17 these proteins may also betray them, as we show here. We found that the  
18 small N-terminal subunit of vitellogenins of the planthopper *Nilaparvata lugens*  
19 (NIVgN) triggers strong defense responses in rice plants when it enters the  
20 plant during feeding or oviposition by the insect. The defenses induced by  
21 NIVgN in plants not only decreased the hatching rate of *N. lugens* eggs, but  
22 also induced volatile emissions in rice plants, which rendered them attractive

23 to a common egg parasitoid. VgN of other planthoppers were found to trigger  
24 the same defense responses in rice. We further show that VgN deposited  
25 during planthopper feeding compared to during oviposition induces a  
26 somewhat different response, probably targeting the appropriate  
27 developmental stage of the insect. The key importance of VgN for planthopper  
28 performance precludes possible evolutionary adaptations to prevent detection  
29 by rice plants.

30

## 31 **Introduction**

32 When attacked by herbivores, plants perceive elicitors derived from herbivores  
33 and then activate early signaling events, such as the increase in  
34 concentrations of cytosolic calcium ion ( $\text{Ca}^{2+}$ ), the activation of  
35 mitogen-activated protein kinases (MAPKs) and the production of reactive  
36 oxygen species (ROS) ([Wu and Baldwin, 2010](#)). The early signaling events  
37 lead to the activation of signaling pathways mediated by defense-related  
38 phytohormones, which mainly consist of jasmonic acid (JA), salicylic acid (SA)  
39 and ethylene (ET). The activated signaling pathways mediate the production of  
40 defensive compounds and thus enhance the resistance of plants to herbivores  
41 ([Schuman and Baldwin, 2016](#)).

42 Several elicitors, such as fatty acid-amino acid conjugates (FACs),  
43 inceptins, caeliferins, bruchins, benzyl cyanide, and indole, have been  
44 identified in oral secretions, oviposition fluids and feces of herbivores ([Hilker](#)

45 [and Fatouros, 2015](#); [Ray et al., 2016](#); [Chen and Mao, 2020](#)). These elicitors  
46 are mostly herbivore species-specific and can induce targeted defense  
47 responses in plants ([Arimura, 2021](#)). So far, elicitors are mainly known for  
48 chewing herbivores ([Chen and Mao, 2020](#)), but a few have also been identified  
49 for piercing-sucking herbivores, such as phosphatidylcholines isolated from  
50 female white-backed planthoppers (WBPH, *Sogatella furcifera*), a bacterial  
51 chaperonin GroEL from the saliva of potato aphid (*Macrosiphum euphorbiae*),  
52 and a mucin-like protein from the saliva of the brown planthopper (BPH,  
53 *Nilaparvata lugens* (Stål)) ([Chaudhary et al., 2014](#); [Yang et al., 2014](#);  
54 [Shangguan et al., 2018](#)). These cases almost exclusively involve elicitors in  
55 the insects' oral secretions, but it is known that egg deposition may also  
56 activate plant defense responses ([Hilker and Fatouros, 2015](#)). Certain  
57 insect-derived compounds have been implicated in such oviposition-related  
58 responses ([Reymond, 2013](#); [Gouhier-Darimont et al., 2013, 2019](#); [Hilker and](#)  
59 [Fatouros, 2015](#); [Bertea et al., 2020](#)), but to date, only phosphatidylcholines  
60 have been identified as specific egg-derived elicitors ([Stahl et al., 2020](#)).

61 Vitellogenins (Vgs) are the major yolk protein precursors that are vital for  
62 the egg development in most oviparous vertebrate and invertebrate animals  
63 ([Tufail and Takeda, 2008](#)). Insect Vgs are mostly synthesized by the fat body in  
64 a sex-, stage- and tissue-specific manner ([Raikhel and Dhadialla, 1992](#)). After  
65 synthesis in the fat body, Vgs are typically cleaved into two subunits, a small  
66 N-terminal subunit (< 65 kDa; VgN) and a large C-terminal subunit (> 150 kDa)

67 at a consensus cleavage site, R/K-X-R/K-R, by subtilisin-like endoproteases  
68 ([Tufail and Takeda, 2008](#)). They are then structurally modified, such as  
69 proteolytic cleavage, glycosylation, phosphorylation and lipidation, and  
70 subsequently secreted into the hemolymph and taken up by oocytes via  
71 receptor-mediated endocytosis ([Tufail et al., 2014](#)). Insect Vgs were previously  
72 considered as female-adult-specific proteins and only produced in fat body  
73 cells. However, recent studies have revealed that Vgs are also found in  
74 sexually immature individuals and male adults ([Piulachs et al., 2003](#); [Huo et al.,  
75 2018](#)). Moreover, Vg genes have been found abundantly expressed in  
76 hemocytes and ovaries, in addition to fat bodies ([Chen et al., 2012](#); [Huo et al.,  
77 2018](#)). In some species, albeit at low levels, they are also expressed in salivary  
78 glands, midguts and non-neuronal glial cells ([Münch et al., 2015](#); [Shen et al.,  
79 2019](#)). Consistent with their distributions in insect bodies, multiple  
80 non-nutritional functions have been attributed to Vgs, in addition to their  
81 nutritional functions. The Vg from honey bee *Apis mellifera* affects food-related  
82 behaviors and some survival traits such as immunity, oxidative stress  
83 resilience and lifespan ([Amdam et al., 2012](#)), as well as the transport of  
84 immune elicitors from mother to offspring ([Salmela et al., 2015](#)). The Vg of  
85 mosquito *Anopheles gambiae* is capable of interfering with the  
86 anti-*Plasmodium* response ([Rono et al., 2010](#)). Insect Vgs are also involved in  
87 the vertical transmission of plant viruses by binding to viral proteins ([Wei et al.,  
88 2017](#); [Huo et al., 2018](#)). The key role that Vgs play in important physiological

89 processes in insects, as well as their specific chemical features, make them  
90 susceptible to recognition by other organisms.

91 The brown planthopper (BPH) (Hemiptera: Delphacidae), a monophagous  
92 piercing-sucking herbivore, is one of the most important insect pests of rice  
93 (*Oryza sativa* L.) in Asia ([Dyck and Thomas, 1979](#)). It damages plants by  
94 feeding on phloem sap (causing minor tissue damages via its stylet), laying  
95 egg clusters in tissues (causing more tissue damages via its ovipositor), but  
96 harm is also caused by viruses transmitted by BPH ([Sōgawa, 1982](#); [Hattori  
97 and Sōgawa, 2002](#)). Newly-emerged BPH female adults do not lay eggs until  
98 they pass their pre-oviposition periods, which generally takes about three days  
99 at 25-28 °C ([Mochida and Okada, 1979](#)). The mature Vg of BPH, NIVg,  
100 contains two vitellogenin-N domains at N-terminus, a middle-region domain of  
101 unknown function (DUF1943) and a von Willebrand factor type D (vWD)  
102 domain at C-terminus ([Tufail et al., 2010](#)). The predicted molecular weight of  
103 NIVg is 227.94 kDa, and the mature protein is typically cleaved into a small  
104 N-terminal subunit (48.33 kDa, NIVgN) and a large C-terminal subunit (179.24  
105 kDa) at the RSRR sequence motif of the N-terminus ([Cheng and Hou, 2005](#);  
106 [Tufail et al., 2010](#)). In addition to high transcript levels in the fat body of BPH  
107 female adults ([Tufail et al., 2010](#)), NIVg was observed to be abundantly  
108 expressed in salivary glands of adult females ([Noda et al., 2008](#); [Ji et al., 2013](#)).  
109 Moreover, NIVg is also expressed in head, midgut, epidermis and thorax of  
110 female adults, midgut and testes of male adults, salivary glands of 3<sup>rd</sup> to 5<sup>th</sup>

111 instar nymphs, and whole body of eggs, 1<sup>st</sup> to 5<sup>th</sup> instar nymphs, female adults  
112 and male adults ([Wang et al., 2015](#); [Shen et al., 2019](#)). *NIVg* plays an  
113 important role in BPH growth, development, and fecundity; knockdown of *NIVg*  
114 causes abnormal increases in body size and mass of BPH female adults, but  
115 reduces the number of eggs laid by female adults ([Shen et al., 2019](#)). In BPH,  
116 there are also two *NIVg*-like genes, *NIVg-like1* and *NIVg-like2*, both of which  
117 are not clustered with the conventional insect *Vgs*, including *NIVg* ([Shen et al.,](#)  
118 [2019](#)). *NIVg* and *NIVg-like2* exhibit similar expression patterns in BPH  
119 developmental stages and tissues, whereas *NIVg-like1* shows different  
120 patterns. Although each of the three genes influences BPH egg development  
121 and fecundity, their specific functions appear to differ ([Shen et al., 2019](#)).

122 *NIVgN* exists not only in BPH hemolymph but also in gelling saliva of 5<sup>th</sup>  
123 instar nymphs, as well as in their eggs and oviposition fluids ([Tufail et al., 2010](#);  
124 [Xie, 2012](#); [Huang et al., 2016](#)). During feeding the saliva enters rice tissues  
125 and coagulates to form a salivary sheath around the stylets, whereas during  
126 oviposition fluids are deposited to glue the eggs to the damaged plant tissue.  
127 This implies that significant amounts of *NIVgN* will enter rice tissues when BPH  
128 infests plants. It has been reported that defense responses in rice induced by  
129 BPH gravid female infestation are distinctly different from those induced by  
130 nymphal infestation. For example, infestation by gravid BPH females  
131 enhances levels of JA and JA-Ile but decreases ethylene levels in rice,  
132 whereas infestation by BPH nymphs does not change the levels of these

133 phytohormones ([Li, 2015](#); [Ji et al., 2017](#); [Ye et al., 2017](#)). These distinct  
134 responses prompted us to hypothesize that NIVgN in BPH saliva and eggs  
135 plays a role in regulating the interaction of adult BPH with rice.

136 In this study, we tested our hypothesis by exploring the role of *NIVg*  
137 (GenBank: AB353856) in BPH-induced defense responses in rice. Combining  
138 molecular tools, chemical analyses and bioassays, we revealed that NIVgN  
139 can indeed enter rice plants via the BPH saliva or from the surface of BPH  
140 eggs. We show that, together with the damage caused by BPH feeding or  
141 oviposition, the small N-terminal subunit of NIVg allows rice plants to  
142 specifically recognize planthopper attacks. As this protein is essential for  
143 planthopper survival, it is seemingly impossible for the planthoppers to avoid  
144 this recognition.

145

## 146 **Results**

### 147 **NIVgN enters rice tissues during BPH feeding and oviposition**

148 BPH causes damage to rice plants by sucking phloem sap or laying its eggs in  
149 rice tissues (Figure 1A-D). As is the case for other insects, the eggs of BPH  
150 contain high levels of vitellogenins ([Cheng and Hou, 2005](#); [Tufail et al., 2010](#)),  
151 but it has been found that NIVgs, especially NIVgN, are also present in BPH  
152 gelling saliva ([Huang et al., 2016](#); [Rao et al., 2019](#)). We therefore examined  
153 whether NIVgN enters rice tissues during BPH feeding as well as oviposition.

154 Western blot analysis with anti-NIVgN showed a band of about 50 kDa in total  
155 proteins from rice leaf sheaths that had been infested by newly-emerged BPH  
156 females (feeding only) for 24 h, whereas no NIVgN band was detected in  
157 proteins from non-infested plants (Figure 1E). Consistent with this finding we  
158 also found, with an immunofluorescence assay (IFA) using anti-NIVgN, that  
159 NIVgN is present around BPH feeding sites (Figure 1F), implying that NIVg  
160 indeed enters rice tissues when BPH feeds on plants.

161 NIVgN also occurs on the surface of BPH eggs (Figure 1G) and specifically in  
162 the egg cap (Figure 1H), which is the upper somewhat transparent part of the  
163 egg that adheres to oviposition-damaged rice tissues (Figure 1C and D).  
164 Additionally, a NIVgN band was detected in the PBS buffer solution used to  
165 extract pieces of rice leaf sheaths on which BPH females had oviposited but  
166 from which eggs had been carefully removed. The band was also found in  
167 similar extracts from intact BPH eggs, whereas no band was detected in PBS  
168 solutions used to extract pieces of rice leaf sheaths infested with  
169 newly-emerged BPH females (no eggs) or uninfested leaf sheaths (Figure 1I).  
170 These results confirm that NIVgN on the surface of BPH eggs come in contact  
171 with damaged rice tissues during oviposition. Taken together, these results  
172 suggest that NIVgN reaches rice plants during BPH feeding and oviposition.

173

174 **NIVgN induces the production of cytosolic Ca<sup>2+</sup> and H<sub>2</sub>O<sub>2</sub> in rice**



175 It has been reported that BPH nymphs, which only feed, as well as gravid  
176 females, which feed and lay eggs, induce increases in the concentration of  
177 cytosolic  $\text{Ca}^{2+}$  and  $\text{H}_2\text{O}_2$  in rice plants. Both of these responses affect signaling  
178 pathways that play an important role in rice defenses ([Zhou et al., 2009](#); [Ye et](#)  
179 [al., 2017](#)). To explore the role of NIVgN plays in activating these two pathways,  
180 we silenced the *NIVg* gene in BPH using RNA interference (RNAi) as  
181 described previously ([Liu et al., 2010](#)) and then investigated the effect of *NIVg*  
182 silencing on the levels of cytosolic  $\text{Ca}^{2+}$  and  $\text{H}_2\text{O}_2$  in rice. Injecting fifth instar  
183 nymphs with double-stranded RNA (dsRNA) of the N-terminal sequence of  
184 *NIVg* (*dsNIVg*) reduced the transcript level of *NIVg* in BPH female adults by  
185 97.90, 90.64 and 73.06% at 1, 3, and 5 d after emergence (2-6 d post injection),  
186 respectively, compared to those in BPH injected with double-stranded RNA of  
187 green fluorescent protein (*dsGFP*) (Figure 2—figure supplement 1A). The  
188 protein level of NIVgN also decreased drastically in BPH injected with *dsNIVg*  
189 (*dsNIVg*-BPH) (Figure 2—figure supplement 1B). This dsRNA injection did not  
190 co-silence *NIVg-like1* and *NIVg-like 2*, showing that the RNAi is specific (Figure  
191 2—figure supplement 1C and 1D). Compared to the levels in plants infested by  
192 newly-emerged *dsGFP*-BPHs adult females (feeding only), the level of NIVgN  
193 in plants infested by newly-emerged *dsNIVg*-BPHs adult female was also  
194 considerably lower (Figure 2A). Cytosolic  $\text{Ca}^{2+}$  and  $\text{H}_2\text{O}_2$  analysis revealed  
195 that feeding by *dsNIVg*-BPHs, compared with feeding by *dsGFP*-BPHs and  
196 C-BPHs, induced a weaker fluorescence intensity around feeding sites at 3 h

197 (Figure 2B and C) and lower levels of H<sub>2</sub>O<sub>2</sub> at 3 and 8 h after BPH infestation  
198 (Figure 2D). Moreover, application of recombination protein NIVgN increased  
199 the H<sub>2</sub>O<sub>2</sub> level in rice plants 15-30 min after treatment (Figure 2E and F),  
200 whereas expressing *NIVgN* in rice (Figure 2—figure supplement 2) enhanced  
201 constitutive and BPH-induced (8 h after infestation) levels of H<sub>2</sub>O<sub>2</sub> in plants  
202 (Figure 2G). These findings demonstrate that NIVgN, either secreted by BPH  
203 salivary glands or on the surface of BPH eggs, contributes to BPH-induced  
204 increases of cytosolic Ca<sup>2+</sup> and production of H<sub>2</sub>O<sub>2</sub> in rice.

205 **Silencing *NIVg* does not affect the production of JA and JA-Ile in rice fed**  
206 **on by BPH but exogenous NIVgN or expressing *NIVgN* in rice does**

207 JA- and ethylene-mediated signaling pathways play a central role in regulating  
208 the resistance of rice to BPH ([Zhou et al., 2009](#); [Lu et al., 2014](#); [Xu et al., 2021](#)).  
209 Moreover, infestation by gravid BPH females (feeding + oviposition) induces  
210 the production of JA and JA-Ile and inhibits the production of ethylene in rice,  
211 whereas infestation by nymphs does not ([Li, 2015](#); [Ji et al., 2017](#); [Ye et al.,](#)  
212 [2017](#); [Ye et al., 2020](#); [Xu et al., 2021](#)). Hence, we wondered if NIVgN plays a  
213 role in modulating the biosynthesis of these phytohormones in rice. Consistent  
214 with previous results ([Ji et al., 2017](#)), BPH feeding did not induce the  
215 production of JA and JA-Ile, nor did the knockdown of *NIVg* affect JA and JA-Ile  
216 levels after BPH feeding. In each case hormone production was very low  
217 (Figure 3—figure supplement 1A and 1B). Although wounding plus EV resulted  
218 in higher JA and JA-Ile levels than in unmanipulated plants, the treatment with

219 wounding plus purified recombination protein NIVgN induced still higher levels  
220 of JA and JA-Ile than in plants with wounding plus EV (Figure 3A and B).  
221 Consistent with these results, wounding plus either the homogenized fresh  
222 BPH egg solution in a phosphate buffer (pH 7.4), the homogenized BPH  
223 eggshell solution in the buffer, or the homogenized dsGFP-BPH ovary solution  
224 in the buffer, all significantly induced the biosynthesis of JA and JA-Ile in plants  
225 compared to wounding plus the buffer alone (Figure 3C-F), whereas wounding  
226 plus the homogenized dsNIVg-BPH ovary solution in the buffer (low levels of  
227 NIVgN) exhibited impaired induction of JA and JA-Ile (Figure 3E and F).  
228 Additionally, plants expressing *NIVgN* showed high constitutive and  
229 BPH-induced (infestation for 24 h) levels of JA and JA-Ile (Figure 3G and H).  
230 Treatment with wounding plus the recombination protein NIVgN did not induce  
231 the biosynthesis of ethylene (Figure 3—figure supplement 1C). Taken together,  
232 these findings indicate that NIVgN-induced production of JA and JA-Ile in rice  
233 is dependent on damage level or type of the tissue that NIVgN comes in  
234 contact with and/or on the effectors and other elicitors derived from BPH  
235 feeding or oviposition. These data further show that NIVgN does not affect the  
236 biosynthesis of ethylene in rice.

237

238 **NIVgN induces the expression of defense-related genes and defense**  
239 **response of rice to BPH infestation**

240 Because NIVgN triggers the production of JA, JA-Ile and H<sub>2</sub>O<sub>2</sub> in rice (Figure 2

241 and Figure 3) and because these molecule-mediated signaling pathways play  
242 an important role in modulating direct and indirect defenses of rice against  
243 BPH ([Zhou et al., 2009](#); [Xiao et al., 2012](#); [Hu et al., 2016](#)), we hypothesized  
244 that treating plants with recombination protein NIVgN will not only alter the  
245 expression of defense-related genes, but also affect the performance of BPH  
246 and the behavioral response of *Anagrus nilarpavatae*, an egg parasitoid of rice  
247 planthoppers. As predicted, the transcript level of three JA-responsive genes,  
248 *OsJAZ8* ([Yamada et al., 2012](#); [Xu et al., 2021](#)), *OsJAZ11* ([Xu et al., 2021](#)), and  
249 *OsPR10a* ([Ersong et al., 2021](#)), and one defense-related gene, *OsWRKY26*  
250 ([Li et al., 2021](#)), in rice, were up-regulated after NIVgN treatment (Figure 3I-L).  
251 The survival and the mass of BPH nymphs and newly-emerged BPH female  
252 adults fed on rice plants that were treated with wounding plus recombination  
253 protein NIVgN were similar to those fed on plants that were treated with  
254 wounding plus purified elution products of the empty vector (Figure 3—figure  
255 supplement 1D-F). In contrast, the hatching rate of BPH eggs and the number  
256 of eggs laid by 15 gravid BPH females (for 24 h) were significantly lower on  
257 plants that were twice treated with NIVgN than EV-treated plants. One-time  
258 treatment with NIVgN did not influence the hatching rate of BPH eggs and the  
259 number of eggs laid by 15 gravid BPH females (Figure 4A and B). Expressing  
260 *NIVgN* in plants also reduced the hatching rate of BPH eggs (Figure 4C and  
261 D).

262 Furthermore, volatiles emitted from plants treated with wounding plus purified

263 recombination protein NIVgN were more attractive to female *A. nilaparvatae*  
264 wasps than volatiles from plants treated with wounding plus EV (Figure 4E).  
265 Volatile collections and analyses revealed that the total amount of volatiles  
266 emitted from plants treated with wounding plus purified recombination protein  
267 NIVgN was significantly higher than the total amount of volatiles from plants  
268 treated with wounding plus EV or from unmanipulated plants. Compared to  
269 non-manipulated control plants, wounding plus EV enhanced levels of four  
270 volatile compounds, 2-heptanone, 2-heptanol,  $\alpha$ -thujene, and linalool, whereas  
271 nine volatile compounds,  $\alpha$ -pinene, sesquithujene,  $\alpha$ -cedrene,  
272 (*E*)- $\beta$ -caryophyllene, (*E*)- $\alpha$ -bergamotene, sesquisabinene A,  $\alpha$ -curcumene,  
273 and two unknown compounds, were released in higher amounts from  
274 recombination protein NIVgN-treated plants compared to control plants (Figure  
275 4F). Taken together, the data imply that NIVgN induces the expression of  
276 defense-related genes and enhances the direct and indirect defense  
277 responses to BPH infestation.

278

### 279 **Silencing *NIVg* impairs BPH feeding, survival and fecundity**

280 Consistent with results reported in [Shen et al., 2019](#), knockdown of *NIVg*  
281 significantly increased the body size and mass of BPH female adults (Figure  
282 5—figure supplement 1A-C), but resulted in oocyte malformations and  
283 drastically reduced the number of mature eggs in the ovaries (Figure 5—figure  
284 supplement 1D and 1E), as well as the number of eggs laid by female adults

285 (Figure 5—figure supplement 1F). Knockdown of *NIVg* also decreased the  
286 amounts of honeydew secreted by newly-emerged female adults of BPH  
287 compared to those secreted by newly-emerged females of BPH injected with  
288 *dsGFP* (*dsGFP*-BPH) and BPH females that were not injected (C-BPH)  
289 (Figure 5A). Moreover, compared with *dsGFP*-BPH and C-BPH, *dsNIVg*-BPH  
290 showed lower survival rates on rice plants and artificial diet 6-10 d and 3-10 d,  
291 respectively, post injection (Figure 5B and C). The data confirm that *NIVg* plays  
292 an important role in the feeding, development, survival and especially  
293 fecundity of BPH.

294

### 295 **VgNs in other rice planthoppers also function as elicitors**

296 Rice plants suffer from attacks by several planthopper species. The main ones  
297 are BPH, WBPH and the small brown planthopper (SBPH) *Laodelphax*  
298 *striatellus*. We wondered whether VgNs in these rice planthoppers also induce  
299 defense responses in rice. We therefore investigated the change in levels of  
300 JA and JA-Ile in rice plants when they were treated with eggs or ovary  
301 solutions of WBPH or SBPH. Similar to results found for BPH, wounding plus  
302 applying the homogenized fresh egg or ovary solution of WBPH or SBPH  
303 resulted in higher levels of JA and JA-Ile than wounding plus applying the  
304 buffer (Figure 6A-D). When *Vg* was knocked down in WBPH or SBPH (Figure  
305 6—figure supplement 1), the same treatments with WBPH or SBPH ovary  
306 solution did not or only weakly induce the production of JA-Ile (Figure 6C and

307 D). Taken together, these findings show that VgN from WBPH and SBPH also  
308 functions as an elicitor that induces defense responses in rice.

309

## 310 **Discussion**

311 The evolutionary arms race between plants and herbivorous insects has  
312 resulted in numerous clever defense traits in plants, and equally ingenious  
313 counter adaptations in specialized insects ([Farmer, 2014](#)). Plant defenses  
314 against insects are often inducible ([Karban and Baldwin, 1997](#)), and in order  
315 for the plants to launch the most appropriate defense they need to recognize  
316 their specific attackers. This is possible thanks to insect specific elicitors, also  
317 referred to as herbivore-associated molecular patterns (HAMPs) ([Felton and](#)  
318 [Tumlinson, 2008](#); [Arimura, 2021](#)). In turn, the insect herbivores are under  
319 strong selective pressure to avoid excreting such indicative elicitors. This  
320 implies that only compounds that insects cannot avoid producing can serve as  
321 reliable elicitors. This is indeed the case for the two most studied types of  
322 HAMPs, fatty acid conjugates like volicitin ([Hettenhausen et al., 2014](#);  
323 [Yoshinaga et al., 2010](#)) and inceptins, which are peptide fragments from  
324 chloroplastic ATP synthase  $\gamma$ -subunit proteins ([Schmelz et al., 2006](#)). Both  
325 types of elicitors are formed in caterpillar buccal cavities during feeding and  
326 cannot be avoided unless the insects adapt their diet ([De Moraes and](#)  
327 [Mescher, 2004](#)) or change digestive enzyme activity ([Schmelz et al., 2012](#)),  
328 respectively. Recently, the first plant receptor to allow this specific recognition

329 of HAMPs was identified ([Steinbrenner et al., 2020](#)).

330 Here we identified a new type of elicitor, the small N-terminal subunit of  
331 vitellogenin protein from the brown planthopper (BPH), NIVgN. It is uniquely  
332 different from other elicitors in that it is introduced into the plants, not only via  
333 the saliva, but also, in large quantities, during oviposition. It activates different  
334 defensive signaling pathways and thereby causes various defense responses  
335 in rice. We also show that NIVgN is essential for BPH growth, development  
336 and fecundity. Hence, NIVgN is an unavoidable HAMP that highly reliable  
337 betrays the presence of BPH and other planthoppers. Below, we discuss the  
338 mode of action of NIVgN and elaborate on the evolutionary and possible pest  
339 control implications of our findings.

340 It is known that infestation by gravid BPH female adults (feeding +  
341 oviposition) activates cytosolic  $Ca^{2+}$  signaling and enhances levels of  $H_2O_2$ ,  
342 JA, JA-Ile and SA, but it inhibits the production of ethylene, whereas infestation  
343 by BPH nymphs or newly-emerged female adults (feeding only; they do not lay  
344 eggs until after they go through a pre-oviposition period) only induces an  
345 increase in levels of cytosolic  $Ca^{2+}$ ,  $H_2O_2$  and SA ([Li, 2015](#); [Ye et al., 2017](#)).  
346 Based on our results we propose that the difference in responses to gravid  
347 BPH females and BPH nymphs is at least in part due to the difference in the  
348 source of NIVgN, in addition to different types of damage inflicted by nymphs  
349 and gravid females. NIVgN enters the plants at feeding sites via BPH saliva, as  
350 well as oviposition sites via the eggs (Figure 1E-I). The importance of this for



351 defense induction was confirmed by the observation that knockdown of *NIVg* in  
352 the insect significantly decreased BPH feeding-induced levels of cytosolic  $\text{Ca}^{2+}$   
353 and  $\text{H}_2\text{O}_2$  (Figure 2A-D) but did not affect JA and JA-Ile levels (Figure 3—figure  
354 supplement 1A and 1B). Moreover, wounding plus the application of solutions  
355 with either homogenized fresh BPH eggs, eggshells or BPH ovaries, all of  
356 which contain NIVgN, induced the biosynthesis of JA and JA-Ile in plants  
357 (Figure 3C-F), whereas knocking down *NIVg* reduced the levels of JA and  
358 JA-Ile induced by the ovary solution (Figure 3E and F). Importantly, exogenous  
359 application of the recombinant NIVgN or expressing *NIVgN* in the rice plants  
360 themselves was sufficient to elicit the production of  $\text{H}_2\text{O}_2$  (Figure 2E-G), JA  
361 and JA-Ile (Figure 3A and B, Figure 3G and H). These results imply that NIVgN  
362 from saliva induces the production of cytosolic  $\text{Ca}^{2+}$  and  $\text{H}_2\text{O}_2$ , whereas NIVgN  
363 from eggs induces the production of cytosolic  $\text{Ca}^{2+}$ ,  $\text{H}_2\text{O}_2$ , as well as JA and  
364 JA-Ile. This appears to be the first report on the role of vitellogenin in inducing  
365 plant defense responses, but, interestingly, vitellin produced by the cattle tick  
366 *Boophilus microplus* has been previously found to act as an elicitor of immune  
367 responses in sheep ([Tellam et al., 2002](#)). Recently, it was reported that the  
368 C-terminus of Vg, VgC, in SBPH, when secreted into rice plants, serves as an  
369 effector ([Ji et al., 2021](#)). This was concluded from the fact that Vg-silenced  
370 SBPH nymphs consistently elicited higher  $\text{H}_2\text{O}_2$  production, whereas  
371 expression of the domains in VgC in rice protoplasts or of VgC in *Nicotiana*  
372 *benthamiana* leaves significantly hindered the accumulation of

373 chitason-induced H<sub>2</sub>O<sub>2</sub>. Moreover, silencing *Vg* reduced SBPH feeding and  
374 survival on rice. The discrepancy between the conclusion from the SBPH study  
375 ([Ji et al., 2021](#)) and ours is possibly due to the fact that, besides the possibility  
376 that different peptides of *VgN* and *VgC* cleaved from *Vg*, in the SBPH study  
377 there was no calibration for the differences in damage levels caused by SBPH  
378 feeding on plants with different treatments. There is also no direct evidence  
379 that *VgC* indeed inhibits the production of SBPH-induced H<sub>2</sub>O<sub>2</sub> in rice and  
380 improves the performance of SBPH on rice.

381 The reason why NIVgN from different sources differently affected the  
382 production of JA and JA-Ile might be related to the type and extent of damage  
383 caused and the compounds that enter into plants during BPH feeding versus  
384 oviposition. BPH is a piercing-sucking herbivore whose feeding only causes  
385 minor tissue damage and only little NIVgN will enter via the stylet sheaths. In  
386 contrast, during oviposition BPH causes considerably more damage to tissues  
387 as it needs to make cuts with its ovipositor to lay egg clusters inside the leaves  
388 (Figure 1B-D). As a consequence, NIVgN from the egg surface comes in direct  
389 contact with damaged tissues and thereby induces considerably stronger  
390 responses in rice plants than the small quantities of NIVgN deposited during  
391 feeding. Moreover, the fluids deposited by BPH also contain effectors and  
392 other elicitors, which are probably different between saliva and  
393 eggs/oviposition fluids. To date, one elicitor, a mucin-like protein ([Shangguan  
394 et al., 2018](#)), and several effectors, such as an endo- $\beta$ -1,4-glucanase ([Ji et al.,](#)

395 [2017](#)), an EF-hand calcium-binding protein ([Ye et al., 2017](#)), and 6 other  
396 proteins ([Rao et al., 2019](#)), from BPH saliva have been reported. The different  
397 combinations of these effectors and elicitors can explain why rice plants  
398 respond somewhat differently to NIVgN during feeding and oviposition.

399       Increases in levels of JA and JA-Ile are known to regulate the resistance  
400 of rice to BPH ([Xu et al., 2021](#)). We therefore investigated the effect of NIVgN  
401 treatment of rice plants on the performance of BPH on these plants. This  
402 revealed that when plants were treated with NIVgN twice, NIVgN-induced  
403 defenses decreased the hatching rate of BPH eggs and the number of eggs  
404 laid by BPH female adults, but when the plants were treated only once with  
405 NIVgN, there was no effect on any BPH performance parameter (Figure 4A  
406 and B; Figure 3—figure supplement 1D-F). The effect of NIVgN-induced  
407 defenses on the hatching rate was also observed in plants expressing *NIVgN*  
408 (Figure 4C and D). Future research will have to elucidate which defensive  
409 compounds cause the death of BPH eggs.

410       In rice, JA- and ethylene-mediated signaling pathways also regulate the  
411 biosynthesis of inducible volatiles ([Lou and Cheng, 2005](#); [Tong et al., 2012](#); [Lu  
412 et al., 2014](#)). NIVgN did not affect the production of ethylene in rice (Figure  
413 3—figure supplement 1C). Hence, the fact that exogenous application of  
414 NIVgN increased the amounts of volatiles emitted from rice plants was  
415 probably due to NIVgN activation of JA and JA-Ile signaling. Compared to  
416 control plants, NIVgN-treated plants produced higher levels of 9 volatile

417 compounds, all of which were also induced by gravid BPH female infestation  
418 ([Xiao et al., 2012](#); [Lu et al., 2014](#)). However, the NIVgN-induced volatile blend  
419 was not exactly the same as the blend induced by gravid BPH females;  
420 2-heptanone, linalool, limonene and methyl salicylate were induced by the  
421 latter but not by the former ([Tong et al., 2012](#)). Again, this discrepancy is  
422 probably due to effectors and other elicitors in BPH saliva and eggs/oviposition  
423 fluids. The changes in volatile emissions implies that NIVgN is not limited to  
424 direct defenses, but also involves volatile-mediated indirect defense that  
425 results in the attraction of parasitoids. Of the nine volatile compounds that  
426 showed increases after NIVgN treatment (Figure 4F), (*E*)- $\beta$ -caryophyllene has  
427 been reported to be attractive to *A. nilaparvatae* ([Lou and Cheng, 2005](#); [Xiao](#)  
428 [et al., 2012](#)). Therefore, the higher attractiveness of NIVgN-treated plants to  
429 this egg parasitoid (Figure 4E) was probably due to increases in this and  
430 possibly other volatiles.

431 We further show that the role of VgN in inducing rice defenses is not  
432 limited to BPH. Solutions with homogenized fresh eggs of two other  
433 planthoppers commonly found on rice, WBPH or SBPH, also induced the  
434 biosynthesis of JA and JA-Ile when applied to mechanically wounded plants  
435 (Figure 6A and B). Moreover, when Vg in WBPH or SBPH was knocked down,  
436 the induction of WBPH or SBPH ovary solution on the production of JA-Ile in  
437 mechanically wounded plants significantly decreased (Figure 6C and D). VgN  
438 is also found in the saliva and eggs of WBPH and SBPH ([Huang et al., 2018](#))

439 and the similarity of the amino acid sequence of VgN among the three  
440 planthoppers is high (84.38%; Figure 6—figure supplement 2). Taken together,  
441 these results indicate that the VgN derived from the three planthoppers  
442 functions as a common elicitor during the interaction between rice and  
443 planthoppers.

444 Vgs and their homologues have been reported to play an important role in  
445 the growth, development, survival and fecundity in many insect species,  
446 including BPH ([Shen et al., 2019](#)). We confirmed this by silencing *NIVg*, which  
447 caused abnormal increases in the body size and mass of BPH female adults  
448 and drastically decreased their fecundity and resulted in failed egg formation in  
449 the ovaries (Figure 5—figure supplement 1) ([Shen et al., 2019](#)). Moreover,  
450 silencing *NIVg* impaired BPH feeding and decreased its survival on rice plants  
451 and artificial diet (Figure 5). The increase in body size and mass of  
452 dsNIVg-BPH female adults is probably at least in part related to the failure of  
453 egg formation, which prevents them from laying eggs like normal female adults  
454 (laying eggs decreases their body size and mass). These findings demonstrate  
455 that NIVgN, like Vgs in other insects, is required for growth, development,  
456 survival and fecundity. Hence, the results not only support our hypothesis that  
457 VgNs play a key role in inducing defense responses in rice plants, they also  
458 reinforce the notion of evolutionary stability and that only compounds that are  
459 essential for insect performance and survival can be dependably exploited by  
460 plants as elicitors. By confirming this key importance of Vgs for planthoppers

461 we also expose the vulnerability of *NI/Vg* and similar genes in other insects,  
462 making them excellent targets for gene silencing strategies to control pests  
463 ([Christiaens et al., 2020](#)). This is evident from our silencing experiment, which  
464 resulted in increased BPH mortality (Figure 5B and C) and almost completely  
465 impaired egg production (Figure 5—figure supplement 1D-F).

466 In summary, our study shows that VgN, the small N-terminal subunit of  
467 vitellogenin from rice planthoppers, readily enters rice tissues during  
468 planthopper feeding and oviposition. VgN from the saliva of rice planthoppers,  
469 together with the damage caused by planthopper feeding, possibly in  
470 combination with effectors and other elicitors, induces the production of  
471 cytosolic  $\text{Ca}^{2+}$  and  $\text{H}_2\text{O}_2$ , whereas VgN from eggs, accompanying the damage  
472 caused during oviposition and possible other chemical factors in oviposition  
473 fluids, induces the production of cytosolic  $\text{Ca}^{2+}$ ,  $\text{H}_2\text{O}_2$ , JA and JA-Ile. The  
474 activated JA signaling pathway decreases the hatching rate of BPH eggs and  
475 the number of eggs laid by BPH female adults, and increases the emission of  
476 volatiles from rice, which enhances the attractiveness of rice plants to the egg  
477 parasitoid *A. nilaparvatae*. Our study not only identifies VgN from rice  
478 planthoppers as a potent elicitor but also provides a compelling example of  
479 how an elicitor combined with varying herbivore inflicted damage types can  
480 cause differential defense responses in plants. The importance of VgNs for the  
481 planthoppers makes them stable and reliable indicators of planthopper  
482 presence and possible targets for molecular pest control strategies.

483

## 484 **Materials and methods**

### 485 **Plant Growth**

486 Rice genotypes used in this study were Taichun Native 1 (TN1), Xiushui 11  
487 (wild type) and transgenic lines expressing *NIVgN* (oe-1 and oe-3; see details  
488 below); TN1 and Xiushui 11 are two rice varieties susceptible to BPH.  
489 Pre-germinated seeds were cultured in plastic bottles (diameter 8 cm; height  
490 10 cm) in a greenhouse ( $27\pm 1^\circ\text{C}$ , 14/10 h light/dark photoperiod). Ten-day-old  
491 seedlings were transferred to 20-L hydroponic boxes with a rice nutrient  
492 solution ([Yoshida et al., 1976](#)), and 30- to 35-day-old plants were transferred to  
493 individual 500-mL hydroponic plastic pots for experiments. Plants used in all of  
494 experiments except for specified experiments were TN1 plants.

### 495 **Insects**

496 A colony of BPH was originally provided by the Chinese National Rice  
497 Research Institute (Hangzhou, China) and maintained on TN1 plants in a  
498 climate chamber at  $27\pm 1^\circ\text{C}$  and 80% relative humidity under a 14/10 h  
499 light/dark photoperiod. Colonies of WBPH and SBPH were originally collected  
500 from rice fields in Hangzhou, China and maintained on TN1 plants in the  
501 climate chamber.

### 502 **Cloning of *NIVgN* and Sequence Analysis**

503 The full-length cDNA of *NIVgN* was obtained by reverse transcription  
504 (RT)-PCR from total RNA isolated from gravid BPH females. Specific primers  
505 (Supplementary file 1) were designed based on the sequence of *NIVg*  
506 (GenBank: AB353856). PCR-amplified fragments were cloned into the  
507 *pEASY*<sup>®</sup>-Blunt Cloning Vector (Transgen, Beijing, China) and sequenced.  
508 DNAMAN ([www.lynnon.com/](http://www.lynnon.com/)) was used to deduce the amino acid sequences  
509 of *NIVgN* and to analyze the molecular weight of the predicted protein. Amino  
510 acid sequences of VgNs from WBPH (SfVgN) and SBPH (LsVgN) have been  
511 reported previously ([Huo et al., 2018](#); [Hu et al., 2019](#)). The multiple sequence  
512 alignment analysis of VgNs from the three rice planthoppers was performed by  
513 the Clustal Omega (<https://www.ebi.ac.uk/Tools/msa/clustalo/>).

#### 514 **Plant treatment**

515 For mechanical wounding treatments, leaf sheaths of individual plant shoots (4  
516 cm length) were punctured 80 times using a #3 insect pin. Unmanipulated  
517 plants were used as controls (Con). For *NIVgN* treatment, plants were  
518 individually wounded as stated above, and then were individually treated with  
519 40  $\mu$ L of the recombinant protein His-*NIVgN* (26.8 ng  $\mu$ L<sup>-1</sup>) or the purified  
520 products of the empty vector (EV), or kept unmanipulated (Con). For ovary,  
521 egg or eggshell solution treatments, plants were wounded as stated above,  
522 and then were individually treated with 40  $\mu$ L of ovary, egg or eggshell solution.  
523 To prepare these solutions, ovaries (dissected from female adults of BPH,  
524 WBPH or SBPH 4 d after emergence and washed with PBS three times), eggs



525 (collected from plants that had been oviposited on by gravid females of BPH,  
526 WBPH or SBPH for 24 h) and eggshells (collected from plants on which BPH  
527 nymphs had hatched within 24 h) were separately collected. All the collections  
528 were then homogenized in PBS containing 1 mM PMSF and the final  
529 concentration of ovary, egg and eggshell in the solution was one ovary, 20  
530 eggs and 40 eggshells per 20  $\mu$ L solution, respectively. Plants were wounded  
531 as described above and then plants were individually treated with 40  $\mu$ L of the  
532 solution of ovaries (Ovary), eggs (Egg) or eggshells (Eggshell) or PBS  
533 (containing 1 mM PMSF), or kept unmanipulated (Con). For BPH treatment,  
534 individual plant shoots were confined in the glass cylinders into which 20  
535 (dsNIVg-BPH) or 15 (dsGFP-BPH and C-BPH) newly-emerged BPH female  
536 adults were introduced; the number of BPH with different treatments,  
537 dsNIVg-BPH, dsGFP-BPH or C-BPH, on each plant was determined according  
538 to the difference in their food intakes on plants (Figure 5A; ensuring that each  
539 plant received equal damage from BPH). To ensure there were no eggs laid on  
540 the plants by these BPH females, they were replaced, every 48h, with a new  
541 set of newly-emerged females with the same treatment. Plants with empty  
542 glass cylinders (Non-infested) and kept unmanipulated (Con) were used as  
543 controls. When plants expressing *NIVgN* and wild type (Xiushui 11) plants  
544 were used, each cylinder received 10 gravid C-BPH females for BPH  
545 treatments.

#### 546 **RNA Extraction and Quantitative Real-time PCR Analysis**

547 Total RNA was extracted from the following materials: (1) whole bodies of  
548 female adults of BPH, WBPH, or SBPH at 1, 3 and 5 d after emergence; (2)  
549 leaf sheaths of rice plants expressing *NIVgN* (lines *oe-1* and *oe-3*) and wild  
550 type plants; (3) leaf sheaths of rice plants that were kept unmanipulated (Con)  
551 or had been treated for 1, 3, 6 and 12 h with wounding plus the purified  
552 recombinant protein NIVgN (NIVgN) or the purified products of the empty  
553 vector (EV). Total RNA was isolated using the SV Total RNA Isolation System  
554 (Promega Corporation, Madison, WI, USA) by following the manufacturer's  
555 protocol. cDNA was synthesized from 500 ng of total RNA in a 10  $\mu$ L reaction  
556 using the Takara Primescript™ RT reagent kit. qRT-PCR was performed with  
557 the CFX96™ Real-Time system (Bio-Rad, Hercules, CA, USA) using the  
558 SYBR Premix EX Taq Kit (Takara Bio Inc., Kusatsu, Japan). A relative  
559 quantitative method ( $2^{-\Delta\Delta C_t}$ ) described previously ([Pfaffl, 2001](#)) was applied to  
560 evaluate the variation in expression levels of target genes among samples.  
561 The expression level of target genes in planthoppers and rice plants was  
562 normalized to *RPS15* (BPH ribosomal protein S15e gene, for developmental  
563 stage) ([Yuan et al., 2014](#)), *RPL9* (WBPH ribosomal protein L9 gene, for  
564 WBPH) and *EF2* (SBPH elongation factor 2 gene, for SBPH), and *OsActin1*  
565 (for rice plants), respectively. The primers used for qRT-PCR analysis in this  
566 study were provided in Supplementary file 2. Three or five independent  
567 biological replicates were used.

## 568 **RNA Interference**

569 A unique region of *NIVg*, *SfVg*, *LsVg* and *GFP* were amplified by PCR with  
570 primers containing the T7 promoter sequence at both ends (Supplementary file  
571 1). The purified PCR products were used to synthesize dsRNA by using the  
572 MEGAscript T7 High Yield Transcription Kit (Ambion, Austin, TX, USA)  
573 according to the manufacturer's instructions. The concentration of dsRNA was  
574 quantified and the quality of dsRNA was further verified via electrophoresis in a  
575 1% agarose gel. Fifth-instar nymphs were injected using the same method as  
576 described previously ([Liu et al., 2010](#)). Each nymph was injected about 0.4 µg  
577 dsRNA of *Vg* or *GFP*, or kept unmanipulated. To detect the silencing efficiency,  
578 the transcript level of *Vg* in the whole bodies of BPH, WBPH or SBPH female  
579 adults that had been injected with dsRNA of *Vg* or *GFP*, or kept non-injected  
580 were determined at 1, 3 and 5 d after emergence (2, 4, and 6 d post injection).  
581 Three independent biological replicates were used.

## 582 **Expression of NIVgN in *Escherichia coli***

583 The open reading frame of *NIVgN* was amplified by PCR using a pair of  
584 primers listed in Supplementary file 1. The PCR product was cloned into the  
585 pET-28a vector (Novagen, Inc., Madison, WI, USA) and sequenced. The  
586 recombinant vector *NIVgN*:pET-28a (Supplementary file 3) and empty vector  
587 pET-28a (as a control) were transformed into *E. coli* BL21 (DE3) strain. The  
588 protein fused with His-tag was expressed after induction with 1 mM isopropyl  
589 β-D-1-thiogalactopyranoside (IPTG) at 16°C for 12 h and purified by using  
590 Ni-NTA resin columns (Qiagen, Venlo, Netherlands) according to the

591 manufacturer's instructions. All products purified from recombinant vector or  
592 empty vector were mixed with 5×protein loading buffer, separated by  
593 SDS-PAGE (sodium dodecyl sulfate polyacrylamide gel electrophoresis) in a  
594 12% (w/v) acrylamide gel, and stained with 0.025% Coomassia Blue R-250 in  
595 water. The predicted mass of the mature recombinant protein NIVgN  
596 containing six N-terminal His-tags is 52.46 kDa.

### 597 **Polyclonal Antibody Preparation and Western Blot Analysis**

598 A polypeptide of NIVgN, NPASNSESNQRSSH was selected as the antigen to  
599 produce the polyclonal rabbit antibodies, and the polyclonal antibodies were  
600 purified by GenScript (Nanjing, China). Protein samples used for western blot  
601 analysis were prepared as follows: (1) Proteins from rice leaf sheaths infested  
602 by BPH or not. Individual plant shoots (0-8 cm above the ground) of TN1 were  
603 confined within a glass cylinder (diameter 4 cm, height 8 cm, with 48 small  
604 holes, diameter 0.8 mm) in which 50 newly-emerged BPH female adults (12-24  
605 h after emergence) that were injected with dsRNA of *GFP* or *NIVg* were  
606 released, and 24 h later, the herbivores were removed. Plants in empty glass  
607 cylinders were used as controls. The outer two leaf sheaths for each plant  
608 were harvested and the entire leaf sheaths from three plants were merged and  
609 ground in liquid nitrogen; approximate 150 mg of samples were homogenized  
610 in 500  $\mu$ L RIPA Lysis Buffer (Beyotime, Shanghai, China) containing 1 mM  
611 PMSF (Phenylmethanesulfonyl fluoride), and the extract was centrifuged at  
612 12,000×g for 5 min at 4°C. The supernatant was collected and the protein

613 concentration in the supernatant was measured by using Pierce BCA Protein  
614 Aaasy Kit (Thermo Fisher Scientific, Rockford, IL, USA). (2) Proteins from the  
615 surface of BPH eggs, as well as from pieces of rice leaf sheaths from which  
616 BPH eggs had been gently removed. For this, plants were individually infested  
617 with 20 gravid BPH females for 24 h. Two hundred intact eggs were carefully  
618 collected from rice leaf sheaths. Then the eggs and the pieces of leaf sheaths  
619 with eggs removed were separately placed into 40  $\mu$ L PBS buffer in a  
620 centrifuge tube for 2-3 min and 8-10 min, respectively. The supernatant was  
621 collected. The supernatants of extracts from pieces of leaf sheaths that were  
622 infested by newly-emerged BPH females (no eggs) or kept unmanipulated  
623 were used as controls. As an additional control we used the PBS buffer alone.  
624 (3) Proteins extracted from the whole bodies of 1-, 3- and 5-day-old BPH  
625 female adults on the 2-, 4- and 6-days post injection with dsRNA of *NlVg* or  
626 *GFP* (as a control). Two BPH female adults were homogenized in 1 mL of  
627 phosphate-buffered saline (PBS, pH 7.4) containing 1 mM PMSF, and the  
628 extract was centrifuged at 12,000 $\times$ g for 10 min at 4 $^{\circ}$ C. The supernatant was  
629 collected and the protein concentration in the supernatant was measured.  
630 Protein samples (20  $\mu$ g from plant samples, 3  $\mu$ g from BPH samples, 20  $\mu$ L  
631 from the solutions used to extract BPH eggs or pieces of leaf sheaths) (mixed  
632 with 5 $\times$ protein loading buffer) were subjected to SDS-PAGE on a 12% gel and  
633 transferred onto a nitrocellulose membrane. The membrane was blocked  
634 overnight at 4 $^{\circ}$ C with skim milk (5%) in 1 $\times$ TBST (Tris-buffered saline with

635 0.05% Tween-20), and then was washed with 1×TBST and incubated with  
636 anti-NIVgN antibody (1:5000) or anti-β-Actin (1:5000; Engibody, Dover, DE,  
637 USA) for 1 h at 37°C, followed by extensive washing for 30 min with frequent  
638 changes of 1×TBST. After this, the membrane was incubated with  
639 HRP-conjugated goat anti-rabbit antibodies (1:10000) or goat anti-mouse  
640 antiantibodies (1:5000) for 1 h at 37°C, followed by extensive washing for 20  
641 min with frequent changes of 1×TBST. Western blots were imaged using the  
642 Clarity™ Western ECL Substrate (Bio-Rad, Hercules, CA, USA) with the  
643 Molecular Imager® ChemiDoc™ XRS+ System (Bio-Rad, Hercules, CA, USA).

#### 644 **Immunofluorescence Microscopy**

645 To locate the position of NIVgN in rice tissues that were infested by gravid BPH  
646 females and in BPH tissues, the following materials were collected. (1) The  
647 outermost leaf sheath of rice plants that had been infested by gravid BPH  
648 females for 6 h; (2) Fresh BPH eggs dissected from leaf sheaths of rice plants  
649 that had been infested by gravid BPH females for 12 h. The specimens were  
650 fixed in 4% paraformaldehyde at room temperature for 2 h and three times  
651 washed in PBS. The specimens were then incubated in PBST/BSA (PBS  
652 containing 2% Tween-20 and 2% bovine serum albumin) at room temperature  
653 for 2 h, followed by incubated at room temperature for 1 h each with  
654 anti-NIVgN antibody (1:200 diluted in PBST/BSA) and Alexa 568-labeled goat  
655 anti-rabbit antibody (1:200 diluted in PBST/BSA, Invitrogen, Carlsbad, CA,  
656 USA). The specimens were washed three times in PBST then examined using

657 a Zeiss LSM 800 confocal laser scanning microscope.

## 658 **Generation of Transgenic Plants**

659 The full-length coding sequence of *NIVgN* was PCR-amplified using a pair of  
660 primers listed in Supplemental Table 1 and was digested by *KpnI* and *XbaI*; the  
661 product was then cloned into the binary vector pCAMBIA1301, yielding an  
662 overexpression transformation vector *NIVgN*:pCAMBIA1301 (Supplementary  
663 file 3). The vector was inserted into the Xiushui 11 plants via *Agrobacterium*  
664 *tumefaciens*-mediated transformation. Rice transformation, screening of the  
665 transgenic plants and identification of the number of insertions were performed  
666 following the same method as described previously ([Zhou et al., 2009](#)). Two  
667 *NIVgN*-expressing lines at T<sub>2</sub> generation, oe-1 and oe-3, each with one  
668 insertion (Figure 2—figure supplement 2), were used for experiments.

## 669 **BPH Bioassays**

670 To investigate the effect of *NIVgN* on BPH feeding capacity, a newly-emerged  
671 brachypterous female adult of ds*NIVg*-BPH, ds*GFP*-BPH or C-BPH (1 d after  
672 the injection of dsRNA of *NIVg* or *GFP*, or no injection, respectively, at  
673 fifth-instar nymph stage) was introduced into a Parafilm bag (6×5 cm), which  
674 was then fixed onto the shoot of a rice plant. Twenty-four hours later, the  
675 amount of honeydew excreted onto the Parafilm by a female adult was  
676 weighed (to an accuracy of 0.1 mg; Sartorius, BSA124S-CW). Each treatment  
677 was replicated thirty times.

678 To determine the influence of NIVgN on the fecundity of BPH, a  
679 newly-emerged BPH female adult of dsNIVg-BPH, dsGFP-BPH or C-BPH as  
680 stated above and a newly-emerged male adult (non-injected) were confined in  
681 the shoot (0-8 cm above the ground) of a plant with the glass cylinder. Ten  
682 days later, the number of eggs laid by each female adult was counted under a  
683 microscopy. Each treatment was replicated eleven times.

684 To assess the effect of NIVgN on the growth of BPH, the mass of female adults  
685 of dsNIVg-BPH, dsGFP-BPH or C-BPH (to an accuracy of 0.1 mg) were  
686 weighed at 1, 3, 5, 7 and 9 d after emergence. Each treatment at each time  
687 point was replicated three to nine times, and each replication contained at  
688 least three BPHs.

689 The effect of NIVgN on the survival of BPH reared on rice plants or artificial diet  
690 was also investigated. Briefly, for the survival experiment on rice plants,  
691 individual plant shoots were confined within the glass cylinders and then 15  
692 newly-emerged female adults of dsNIVg-BPH, dsGFP-BPH or C-BPH as  
693 stated above were introduced into each cylinder. For the survival experiment  
694 on AD, one open end of the glass cylinder was covered with two layers of  
695 stretched Parafilm membrane, which contained an artificial diet ([Fu et al.,  
696 2001](#)), then, fifteen newly-emerged female adults of dsNIVg-BPH, dsGFP-BPH  
697 or C-BPH were released as described above. The artificial diet was replaced  
698 every day. The number of surviving BPHs was recorded for 10 days. Five  
699 independent replications were performed.



700 To explore the effect of treatment with the recombination protein NIVgN on the  
701 survival of BPH nymphs or newly-emerged female adults, plants were  
702 randomly assigned to NIVgN, EV and control treatments. Twenty-four h later,  
703 individual plant shoots (0-8 cm above the ground) were confined within the  
704 glass cylinders into which 20 nymphs or 15 newly-emerged female adults of  
705 BPH were introduced. The number of the surviving BPHs was recorded every  
706 day for 10 days, and the mass of all BPHs was weighed at the end of the  
707 experiment. Five independent replications were performed.

708 To investigate the effect of treatment with the recombination protein NIVgN on  
709 the hatching rate of BPH eggs, plants were randomly assigned to NIVgN, EV  
710 and control treatments. These plants were divided into two groups each with  
711 NIVgN, EV and control treatments. Twelve h later, one of the two group of  
712 plants was retreated again (receiving the same treatments as before).  
713 Twenty-four h after the first treatment, fifteen gravid BPH females were allowed  
714 to oviposit on each plant of the two groups for 24 h. The number of  
715 newly-hatched nymphs on each plant was counted every day until no newborn  
716 nymph appeared for three consecutive days. Unhatched eggs in each plant  
717 were counted under the microscope to calculate the hatching rate of eggs. Ten  
718 replications for each treatment were performed.

719 We also measured the effect of plants expressing NIVgN on the hatching rate  
720 of BPH eggs. Plants of WT (Xiushui 11) and two transgenic lines were  
721 individually exposed to 15 gravid BPH females that were allowed to oviposit for

722 24 h. Then, the hatching rate of BPH eggs on WT and transgenic plants was  
723 calculated using the same method as above. Each line was replicated at least  
724 nine times.

#### 725 **Intracellular Calcium Ion Variation Determination**

726 Fluo-3 AM (acetoxy-methyl ester of Fluo-3) was used to determine the  
727 intracellular calcium ion variation as previously described ([Ye et al., 2017](#)).  
728 Briefly, a working solution of 5  $\mu$ M Fluo-3 AM (stock solution in dimethyl  
729 sulfoxide) containing 50 mM MES (2-(N-morpholino) ethanesulfonic acid)  
730 buffer (pH 6.0), 0.5 mM calcium sulfate, 2.5  $\mu$ M  
731 3-(3,4-dichlorophenyl)-1,1-dimethylurea and 1% methanol. The shoots of TN1  
732 plants were individually confined in the glass cylinders into which 15  
733 newly-emerged female adults of dsNIVg-BPH or dsGFP-BPH were released  
734 as explained above. Infested parts of leaf sheaths (about 3 cm) were  
735 individually harvested 1 and 3 h after infestation, and were immediately  
736 incubated in 1 mL of 5  $\mu$ M Fluo-3 AM working solution at 37°C for 30 min. The  
737 samples were mounted on a Zeiss LSM 780 confocal laser scanning  
738 microscope and were observed at 488 nm excitation wavelength. Images  
739 generated by the Zen 2010 software were analyzed by using the ImageJ  
740 software (<https://imagej.nih.gov/ij>). The fluorescence intensity at BPH feeding  
741 sites was individually measured at least sixteen times.

#### 742 **H<sub>2</sub>O<sub>2</sub> Analysis**

743 TN1 plants were randomly assigned to NIVgN, EV and control treatments;  
744 Transgenic and WT (Xiushui 11) plants were randomly assigned to BPH and  
745 control treatments. For NIVgN, EV and control treatment, leaf sheaths of each  
746 plant were harvested at 0.5, 1, and 3 h after the start of treatment. For BPH  
747 and control treatment, leaf sheaths of each plant were harvested at 3, 8, and  
748 24 h after BPH infestation. H<sub>2</sub>O<sub>2</sub> was extracted using the same method as  
749 described previously ([Lou and Baldwin, 2006](#)) and the concentration of H<sub>2</sub>O<sub>2</sub>  
750 were determined using Amplex-Red Hydrogen Peroxide/Peroxidase Assay Kit  
751 (Invitrogen, Carlsbad, CA, USA), following the manufacturer's instructions.  
752 Each treatment at each time point was replicated five times. We also analyzed  
753 H<sub>2</sub>O<sub>2</sub> by in situ detection. Rice leaves were pierced and treated with 20 µL of  
754 the recombinant protein NIVgN (26.8 ng µL<sup>-1</sup>) or the purified products of the  
755 empty vector (EV), or kept unmanipulated (Con). Fifteen min later at room  
756 temperature, leaves were stained with 3,3'-Diaminobenzidine (DAB) as  
757 described previously ([Asano et al., 2012](#)).

#### 758 **JA and JA-Ile Analysis**

759 TN1 plants were randomly assigned to BPH, NIVgN, EV, Ovary, Egg, Eggshell,  
760 PBS and control treatments; WT (Xiushui 11) and transgenic plants were  
761 randomly assigned to BPH and control. For NIVgN, EV and control treatment,  
762 leaf sheaths were harvested at 0.5, 1, 3, 6, 12, and 24 h after treatment. For  
763 Ovary, Egg, Eggshell, PBS and control treatment, leaf sheaths were harvested  
764 at 1 and/or 3 h after treatment. For BPH treatments, leaf sheaths of TN1 plants

765 were harvested at 48, 72, and 96 h after infestation by newly-emerged BPH  
766 non-ovipositing female adults; leaf sheaths of WT and transgenic plants were  
767 harvested at 0 and 24 h after gravid BPH female infestation. JA and JA-Ile  
768 were extracted with ethyl acetate spiked with labeled internal standards  
769 ( $^2\text{D}_6$ -JA and  $^2\text{D}_6$ -JA-Ile) following the method described previously ([Lu et al.,](#)  
770 [2015](#)) and analyzed by HPLC-MS/MS. Each treatment at each time point was  
771 replicated at least five times.

### 772 **Ethylene Analysis**

773 TN1 plants were randomly assigned to NIVgN, EV and control treatments.  
774 Ethylene accumulation from individual plants with different treatments was  
775 measured by GC at 24, 48, and 72 h after the start of the treatment using the  
776 same method as described previously ([Lu et al., 2006](#)). Each treatment at  
777 each time interval was replicated eight times.

### 778 **Volatile Collection and Isolation**

779 TN1 plants were randomly assigned to NIVgN, EV and control treatments.  
780 Twelve h after treatment, the volatiles emitted from individual plants were  
781 collected (for 8 h), isolated and identified using the method described  
782 previously ([Lou and Cheng, 2005](#)). The compounds were expressed as a  
783 percentage of peak areas relative to the internal standard (IS, diethyl  
784 sebacate) per 8 h of trapping for one plant. Collections were replicated four  
785 times for each treatment.

## 786 **Olfactometer Bioassays**

787 Behavioral responses of *A. nilaparvatae* females to rice volatiles were  
788 performed in a Y-tube olfactometer using the same method as described  
789 previously ([Lou and Cheng, 2005](#)). The attraction of the parasitoid females  
790 exposed to the following pair of odor sources was recorded: TN1 plants treated  
791 with wounding plus purified recombination protein NIVgN for 12 h versus TN1  
792 plants treated with wounding plus purified elution products of the empty vector  
793 for 12 h. For each treatment, 8 plants were used, and the odor sources were  
794 replaced by a new set of 8 plants after testing 20 wasps. In total, three sets of  
795 plants and 60 female parasitoids were used.

## 796 **Data Analysis**

797 Two-treatment data were analyzed using Student's *t* tests or chi-squared test  
798 (olfactometer bioassays). Data from three or more treatment groups was  
799 compared using one-way ANOVA; if the ANOVA was significant ( $P < 0.05$ ),  
800 Tukey's honest significant difference (HSD) post-hoc test was used to detect  
801 significant differences between treatments. All statistical analyses were  
802 performed using IBM SPSS Statistics 20.

## 803 **Data availability**

804 All data generated or analyzed during this study are included in the manuscript  
805 and supporting files. Source data files have been provided for all figures and  
806 figure supplements.

807

## 808 **Funding**

809 This work was jointly supported by the National Natural Science Foundation of  
810 China (31520103912) and the earmarked fund for China Agriculture Research  
811 System (CARS-01-43) (to Y.L.). The contribution by T.C.J.T. was supported by  
812 European Research Council Advanced Grant 788949.

## 813 **Author contributions**

814 J.Z., W.Y., T.C.J.T. and Y.L. conceived and designed the experiments. J.Z.,  
815 W.Y., W.H., X.J., P.K., W.X., and Y.J. performed the experiments. J.Z., W.Y,  
816 W.H. and Y.L. analyzed the data. J.Z., T.C.J.T. and Y.L. wrote the manuscript.  
817 All authors have read and approved the final manuscript.

## 818 **Acknowledgments**

819 Authors declare that they have no competing interests.

820

## 821 **References**

822 **Amdam, G.V., Fennern, E., and Havukainen, H.** (2012). Vitellogenin in honey  
823 bee behavior and lifespan. *Honeybee Neurobiology and Behavior*. Springer,  
824 Dordrecht. 10.1007/978-94-007-2099-2\_2.

825 **Arimura, G.I.** (2021). Making sense of the way plants sense herbivores.  
826 *Trends Plant Sci.* **26**:288-298. 10.1016/j.tplants.2020.11.001.

827 **Asano, T., Hayashi, N., Kobayashi, M., Aoki, N., Miyao, A., Mitsuhara, I.,**  
828 **Ichikawa, H., Komatsu, S., Hirochika, H., Kikuchi, S., et al.** (2012). A rice

829 calcium-dependent protein kinase OsCPK12 oppositely modulates  
830 salt-stress tolerance and blast disease resistance. *Plant J.* **69**:26-36.  
831 [10.1111/j.1365-3113X.2011.04766.x](https://doi.org/10.1111/j.1365-3113X.2011.04766.x).

832 **Bertea, C. M., Casacci, L. P., Bonelli, S., Zampollo, A., and Barbero, F.**  
833 (2020). Chemical, physiological and molecular responses of host plants to  
834 lepidopteran egg-laying. *Front. Plant Sci.* 1768. [10.3389/fpls.2019.01768](https://doi.org/10.3389/fpls.2019.01768).

835 **Chaudhary, R., Atamian, H.S., Shen, Z., Briggs, S.P., and Kaloshian, I.**  
836 (2014). GroEL from the endosymbiont *Buchnera aphidicola* betrays the  
837 aphid by triggering plant defense. *Proc. Natl. Acad. Sci. U S A*  
838 **111**:8919-8924. [10.1073/pnas.1407687111](https://doi.org/10.1073/pnas.1407687111).

839 **Chen, C.Y., and Mao, Y.B.** (2020). Research advances in plant-insect  
840 molecular interaction. *F1000Res.* **9**:198. [10.12688/f1000research.21502.1](https://doi.org/10.12688/f1000research.21502.1).

841 **Chen, S.L., Lin, C.P., and Lu, K.H.** (2012). cDNA isolation, expression, and  
842 hormonal regulation of yolk protein genes in the oriental fruit fly, *Bactrocera*  
843 *dorsalis* (Hendel) (Diptera: Tephritidae). *J. Insect Physiol.* **58**:763-770.  
844 [10.1016/j.jinsphys.2011.12.007](https://doi.org/10.1016/j.jinsphys.2011.12.007).

845 **Cheng, D.J., and Hou, R.F.** (2005). Determination and distribution of a  
846 female-specific protein in the brown planthopper, *Nilaparvata lugens* Stal  
847 (Homoptera: Delphacidae). *Tissue Cell* **37**:37-45.  
848 [10.1016/j.tice.2004.09.003](https://doi.org/10.1016/j.tice.2004.09.003).

849 **Christiaens, O., Whyard, S., Velez, A.M., and Smaghe, G.** (2020).  
850 Double-stranded RNA technology to control insect pests: Current status and

- 851 challenges. *Front Plant Sci.* **11**:451. 10.3389/fpls.2020.00451.
- 852 **De Moraes, C.M., and Mescher, M.C.** (2004). Biochemical crypsis in the  
853 avoidance of natural enemies by an insect herbivore. *Proc. Natl. Acad. Sci.*  
854 U S A **101**:8993-8997. 10.1073/pnas.0403248101.
- 855 **Dyck, V.A., and Thomas, B.** (1979). The brown planthopper problem. Brown  
856 planthopper: Threat to rice production in Asia. International Rice Research  
857 Institute, Los Baños, Philippines.
- 858 **Ersong, Z., Xuming, W., Rumeng, X., Feibo, Y., Chao, Z., Yong, Y., Yang,**  
859 **C., Jianping, C., Chengqi, Y., and Jie, Z.** (2021). Regulation of *OsPR10a*  
860 promoter activity by phytohormone and pathogen stimulation in rice. *Rice*  
861 *Sci.* **28**:442-456. 10.1016/j.rsci.2021.07.005.
- 862 **Farmer, E.E.** (2014). Leaf defence. Oxford University Press.
- 863 **Felton, G.W., and Tumlinson, J.H.** (2008). Plant-insect dialogs: complex  
864 interactions at the plant-insect interface. *Curr. Opin. Plant Biol.* **11**:457-463.  
865 10.1016/j.pbi.2008.07.001.
- 866 **Fu, Q., Zhang, Z., Hu, C., Lai, F., and Sun, Z.** (2001). A chemically defined  
867 diet enables continuous rearing of the brown planthopper, *Nilaparvata*  
868 *lugens* (Stål) (Homoptera: Delphacidae). *Appl. Entomol. Zool.* **36**:111-116.  
869 10.1303/aez.2001.111.
- 870 **Gouhier-Darimont, C., Schmiesing, A., Bonnet, C., Lassueur, S., and**  
871 **Reymond, P.** (2013). Signalling of *Arabidopsis thaliana* response to *Pieris*  
872 *brassicae* eggs shares similarities with PAMP-triggered immunity. *J. Exp.*



- 873 Bot. **64**: 665-674. 10.1093/jxb/ers362.
- 874 **Gouhier-Darimont, C., Stahl, E., Glauser, G., and Reymond, P.** (2019). The  
875 Arabidopsis lectin receptor kinase LecRK-I. 8 is involved in insect egg  
876 perception. *Front. Plant Sci.* **10**:623. [10.3389/fpls.2019.00623](https://doi.org/10.3389/fpls.2019.00623).
- 877 **Hattori, M., and Sōgawa, K.** (2002). Oviposition behavior of the rice brown  
878 planthopper, *Nilaparvata lugens* (Stål), and its electronic monitoring. *J.*  
879 *Insect Behav.* **15**:283-293. 10.1023/A:1015445202906.
- 880 **Hettenhausen, C., Heinrich, M., Baldwin, I.T., and Wu, J.** (2014). Fatty  
881 acid-amino acid conjugates are essential for systemic activation of salicylic  
882 acid-induced protein kinase and accumulation of jasmonic acid in *Nicotiana*  
883 *attenuata*. *BMC Plant Biol.* **14**:326. 10.1186/s12870-014-0326-z.
- 884 **Hilker, M., and Fatouros, N.E.** (2015). Plant responses to insect egg  
885 deposition. *Annu. Rev. Entomol.* **60**:493-515.  
886 10.1146/annurev-ento-010814-020620.
- 887 **Hu, K., Tian, P., Tang, Y., Yang, L., Qiu, L., He, H., Ding, W., Li, Z., and Li,**  
888 **Y.** (2019). Molecular characterization of vitellogenin and its receptor in  
889 *Sogatella furcifera*, and their function in oocyte maturation. *Front Physiol.*  
890 **10**:1532. 10.3389/fphys.2019.01532.
- 891 **Hu, L., Ye, M., Li, R., and Lou, Y.** (2016). OsWRKY53, a versatile switch in  
892 regulating herbivore-induced defense responses in rice. *Plant Signal. Behav.*  
893 **11**:e1169357. 10.1080/15592324.2016.1169357.
- 894 **Huang, H.J., Liu, C.W., Huang, X.H., Zhou, X., Zhuo, J.C., Zhang, C.X., and**

- 895 **Bao, Y.Y.** (2016). Screening and functional analyses of *Nilaparvata lugens*  
896 salivary proteome. *J. Proteome Res.* **15**:1883-1896.  
897 [10.1021/acs.jproteome.6b00086](https://doi.org/10.1021/acs.jproteome.6b00086).
- 898 **Huang, H.J., Lu, J.B., Li, Q., Bao, Y.Y., and Zhang, C.X.** (2018). Combined  
899 transcriptomic/proteomic analysis of salivary gland and secreted saliva in  
900 three planthopper species. *J. Proteomics* **172**:25-35.  
901 [10.1016/j.jprot.2017.11.003](https://doi.org/10.1016/j.jprot.2017.11.003).
- 902 **Huo, Y., Yu, Y., Chen, L., Li, Q., Zhang, M., Song, Z., Chen, X., Fang, R.,**  
903 **and Zhang, L.** (2018). Insect tissue-specific vitellogenin facilitates  
904 transmission of plant virus. *PLoS Pathog.* **14**:e1006909.  
905 [10.1371/journal.ppat.1006909](https://doi.org/10.1371/journal.ppat.1006909).
- 906 **Ji, R., Fu, J., Shi, Y., Li, J., Jing, M., Wang, L., Yang, S., Tian, T., Wang, L.,**  
907 **Ju, J., et al.** (2021). Vitellogenin from planthopper oral secretion acts as a  
908 novel effector to impair plant defenses. *New Phytol.* **232**:802-817.  
909 [10.1111/nph.17620](https://doi.org/10.1111/nph.17620).
- 910 **Ji, R., Ye, W., Chen, H., Zeng, J., Li, H., Yu, H., Li, J., and Lou, Y.** (2017). A  
911 salivary endo-beta-1,4-glucanase acts as an effector that enables the brown  
912 planthopper to feed on rice. *Plant Physiol.* **173**:1920-1932.  
913 [10.1104/pp.16.01493](https://doi.org/10.1104/pp.16.01493).
- 914 **Ji, R., Yu, H., Fu, Q., Chen, H., Ye, W., Li, S., and Lou, Y.** (2013).  
915 Comparative transcriptome analysis of salivary glands of two populations of  
916 rice brown planthopper, *Nilaparvata lugens*, that differ in virulence. *PLoS*

- 917 One **8**:e79612. 10.1371/journal.pone.0079612.
- 918 **Karban, R., and Baldwin, I.T.** (1997). Induced responses to herbivory.  
919 University of Chicago Press. 10.7208/9780226424972.
- 920 **Li, J.C.** (2015). Comparison of defense responses in rice induced by feeding  
921 and oviposition of the brown planthopper *Nilaparvata lugens* and their  
922 underlying mechanisms. Doctoral dissertation, Zhejiang University,  
923 Hangzhou, Zhejiang.
- 924 **Li, Y., Liao, S., Mei, P., Pan, Y., Zhang, Y., Zheng, X., Xie, Y., and Miao, Y.**  
925 (2021). *OsWRKY93* dually functions between leaf senescence and in  
926 response to biotic stress in rice. *Front Plant Sci.* **12**:643011.  
927 10.3389/fpls.2021.643011.
- 928 **Liu, S., Ding, Z., Zhang, C., Yang, B., and Liu, Z.** (2010). Gene knockdown  
929 by intro-thoracic injection of double-stranded RNA in the brown planthopper,  
930 *Nilaparvata lugens*. *Insect Biochem. Mol. Biol.* **40**:666-671.  
931 10.1016/j.ibmb.2010.06.007.
- 932 **Lou, Y., and Baldwin, I.T.** (2006). Silencing of a germin-like gene in *Nicotiana*  
933 *attenuata* improves performance of native herbivores. *Plant Physiol.*  
934 **140**:1126-1136. 10.1104/pp.105.073700.
- 935 **Lou, Y.G., Ma, B., and Cheng, J.A.** (2005). Attraction of the parasitoid  
936 *Anagrus nilaparvatae* to rice volatiles induced by the rice brown planthopper  
937 *Nilaparvata lugens*. *J. Chem. Ecol.* **31**:2357-2372.  
938 10.1007/s10886-005-7106-z.

- 939 **Lu, J., Li, J., Ju, H., Liu, X., Erb, M., Wang, X., and Lou, Y.** (2014).  
940 Contrasting effects of ethylene biosynthesis on induced plant resistance  
941 against a chewing and a piercing-sucking herbivore in rice. *Mol. Plant*  
942 **7**:1670-1682. 10.1093/mp/ssu085.
- 943 **Lu, J., Robert, C.A., Riemann, M., Cosme, M., Mene-Saffrane, L., Massana,**  
944 **J., Stout, M.J., Lou, Y., Gershenzon, J., and Erb, M.** (2015). Induced  
945 jasmonate signaling leads to contrasting effects on root damage and  
946 herbivore performance. *Plant Physiol.* **167**:1100-1116.  
947 10.1104/pp.114.252700.
- 948 **Lu, Y., Wang, X., Lou, Y., and Cheng, J.** (2006). Role of ethylene signaling in  
949 the production of rice volatiles induced by the rice brown planthopper  
950 *Nilaparvata lugens*. *Chin. Sci. Bull.* **51**:2457-2465.  
951 10.1007/s11434-006-2148-3.
- 952 **Mochida, O., and Okada, T.** (1979). Taxonomy and biology of *Nilaparvata*  
953 *lugens* (Hom., Delphacidae). Brown planthopper: Threat to rice production in  
954 Asia. International Rice Research Institute, Los Baños, Philippines.
- 955 **Münch, D., Ihle, K.E., Salmela, H., and Amdam, G.V.** (2015). Vitellogenin in  
956 the honey bee brain: Atypical localization of a reproductive protein that  
957 promotes longevity. *Exp. Gerontol.* **71**:103-108.  
958 10.1016/j.exger.2015.08.001.
- 959 **Noda, H., Kawai, S., Koizumi, Y., Matsui, K., Zhang, Q., Furukawa, S.,**  
960 **Shimomura, M., and Mita, K.** (2008). Annotated ESTs from various tissues

961 of the brown planthopper *Nilaparvata lugens*: a genomic resource for  
962 studying agricultural pests. *BMC Genomics* **9**:117.  
963 10.1186/1471-2164-9-117.

964 **Pfaffl, M.W.** (2001). A new mathematical model for relative quantification in  
965 real-time RT-PCR. *Nucleic Acids Res.* **29**:e45. 10.1093/nar/29.9.e45.

966 **Piulachs, M.D., Guidugli, K.R., Barchuk, A.R., Cruz, J., Simões, Z.L.P.,**  
967 **and Bellés, X.** (2003). The vitellogenin of the honey bee, *Apis mellifera*:  
968 structural analysis of the cDNA and expression studies. *Insect Biochem. Mol.*  
969 *Biol.* **33**:459-465. 10.1016/s0965-1748(03)00021-3.

970 **Raikhel, A.S., and Dhadialla, T.S.** (1992). Accumulation of yolk proteins in  
971 insect oocytes. *Annu. Rev. Entomol.* **37**:217-251.  
972 10.1146/annurev.en.37.010192.001245.

973 **Rao, W., Zheng, X., Liu, B., Guo, Q., Guo, J., Wu, Y., Shangguan, X., Wang,**  
974 **H., Wu, D., Wang, Z., et al.** (2019). Secretome analysis and in planta  
975 expression of salivary proteins identify candidate effectors from the brown  
976 planthopper *Nilaparvata lugens*. *Mol. Plant Microbe. Interact.* **32**:227-239.  
977 10.1094/MPMI-05-18-0122-R.

978 **Ray, S., Alves, P.C., Ahmad, I., Gaffoor, I., Acevedo, F.E., Peiffer, M., Jin,**  
979 **S., Han, Y., Shakeel, S., Felton, G.W., et al.** (2016). Turnabout is fair play:  
980 herbivory-induced plant chitinases excreted in fall armyworm frass suppress  
981 herbivore defenses in maize. *Plant Physiol.* **171**:694-706.  
982 10.1104/pp.15.01854.

- 983 **Reymond, P.** (2013). Perception, signaling and molecular basis of  
984 oviposition-mediated plant responses. *Planta*. **238**:247-258.  
985 [10.1007/s00425-013-1908-y](https://doi.org/10.1007/s00425-013-1908-y).
- 986 **Rono, M.K., Whitten, M.M., Oulad-Abdelghani, M., Levashina, E.A., and**  
987 **Marois, E.** (2010). The major yolk protein vitellogenin interferes with the  
988 anti-*plasmodium* response in the malaria mosquito *Anopheles gambiae*.  
989 *PLoS Biol.* **8**:e1000434. [10.1371/journal.pbio.1000434](https://doi.org/10.1371/journal.pbio.1000434).
- 990 **Salmela, H., Amdam, G.V., and Freitak, D.** (2015). Transfer of immunity from  
991 mother to offspring is mediated via egg-yolk protein vitellogenin. *PLoS*  
992 *Pathog.* **11**:e1005015. [10.1371/journal.ppat.1005015](https://doi.org/10.1371/journal.ppat.1005015).
- 993 **Schmelz, E.A., Carroll, M.J., LeClere, S., Phipps, S.M., Meredith, J.,**  
994 **Chourey, P.S., Alborn, H.T., and Teal, P.E.A.** (2006). Fragments of ATP  
995 synthase mediate plant perception of insect attack. *Proc. Natl. Acad. Sci. U*  
996 *S A* **103**:8894-8899. [10.1073/pnas.0602328103](https://doi.org/10.1073/pnas.0602328103).
- 997 **Schmelz, E.A., Huffaker, A., Carroll, M.J., Alborn, H.T., Ali, J.G., and Teal,**  
998 **P.E.** (2012). An amino acid substitution inhibits specialist herbivore  
999 production of an antagonist effector and recovers insect-induced plant  
1000 defenses. *Plant Physiol.* **160**:1468-1478. [10.1104/pp.112.201061](https://doi.org/10.1104/pp.112.201061).
- 1001 **Schuman, M.C., and Baldwin, I.T.** (2016). The layers of plant responses to  
1002 insect herbivores. *Annu. Rev. Entomol.* **61**:373-394.  
1003 [10.1146/annurev-ento-010715-023851](https://doi.org/10.1146/annurev-ento-010715-023851).
- 1004 **Shangguan, X., Zhang, J., Liu, B., Zhao, Y., Wang, H., Wang, Z., Guo, J.,**

- 1005 **Rao, W., Jing, S., Guan, W., et al.** (2018). A mucin-like protein of  
1006 planthopper is required for feeding and induces immunity response in plants.  
1007 *Plant Physiol.* **176**:552-565. 10.1104/pp.17.00755.
- 1008 **Shen, Y., Chen, Y.Z., Lou, Y.H., and Zhang, C.X.** (2019). Vitellogenin and  
1009 vitellogenin-like genes in the brown planthopper. *Front Physiol.* **10**:1181.  
1010 10.3389/fphys.2019.01181.
- 1011 **Sōgawa, K.** (1982). The rice brown planthopper: feeding physiology and host  
1012 plant interactions. *Annu. Rev. Entomol.* **27**:49-73.  
1013 10.1146/annurev.en.27.010182.000405.
- 1014 **Stahl, E., Brillatz, T., Ferreira Queiroz, E., Marcourt, L., Schmiesing, A.,**  
1015 **Hilfiker, O., Riezman, I., Riezman, H., Wolfender, J.L., and Reymond, P.**  
1016 (2020). Phosphatidylcholines from *Pieris brassicae* eggs activate an  
1017 immune response in Arabidopsis. *Elife* **9**:e60293. 10.7554/eLife.60293.
- 1018 **Steinbrenner, A.D., Munoz-Amatriain, M., Chaparro, A.F.,**  
1019 **Aguilar-Venegas, J.M., Lo, S., Okuda, S., Glauser, G., Dongiovanni, J.,**  
1020 **Shi, D., Hall, M., et al.** (2020). A receptor-like protein mediates plant  
1021 immune responses to herbivore-associated molecular patterns. *Proc. Natl.*  
1022 *Acad. Sci. U S A* **117**:31510-31518. 10.1073/pnas.2018415117.
- 1023 **Tellam, R.L., Kemp, D., Riding, G., Briscoe, S., Smith, D., and Sharp, P.,**  
1024 **Irving, D., Willadsen, P.** (2002). Reduced oviposition of *Boophilus*  
1025 *microplus* feeding on sheep vaccinated with vitellin. *Vet. Parasitol.*  
1026 **103**:141-156. 10.1016/S0304-4017(01)00573-8.

- 1027 **Tong, X., Qi, J., Zhu, X., Mao, B., Zeng, L., Wang, B., Li, Q., Zhou, G., Xu,**  
1028 **X., Lou, Y., et al.** (2012). The rice hydroperoxide lyase OsHPL3 functions in  
1029 defense responses by modulating the oxylipin pathway. *Plant J.* **71**:763-775.  
1030 10.1111/j.1365-313X.2012.05027.x.
- 1031 **Tufail, M., and Takeda, M.** (2008). Molecular characteristics of insect  
1032 vitellogenins. *J. Insect Physiol.* **54**:1447-1458.  
1033 10.1016/j.jinsphys.2008.08.007.
- 1034 **Tufail, M., Naeemullah, M., Elmogy, M., Sharma, P.N., Takeda, M., and**  
1035 **Nakamura, C.** (2010). Molecular cloning, transcriptional regulation, and  
1036 differential expression profiling of vitellogenin in two wing-morphs of the  
1037 brown planthopper, *Nilaparvata lugens* Stal (Hemiptera: Delphacidae).  
1038 *Insect Mol. Biol.* **19**:787-798. 10.1111/j.1365-2583.2010.01035.x.
- 1039 **Tufail, M., Nagaba, Y., Elgendy, A.M., and Takeda, M.** (2014). Regulation of  
1040 vitellogenin genes in insects. *Entomol. Sci.* **17**:269-282. 10.1111/ens.12086.
- 1041 **Wang, X., Zhang, M., Feng, F., and He, R.** (2015). Differentially regulated  
1042 genes in the salivary glands of brown planthopper after feeding in resistant  
1043 versus susceptible rice varieties. *Arch. Insect Biochem. Physiol.* **89**:69-86.  
1044 10.1002/arch.21226.
- 1045 **Wei, J., He, Y.Z., Guo, Q., Guo, T., Liu, Y.Q., Zhou, X.P., Liu, S.S., and**  
1046 **Wang, X.W.** (2017). Vector development and vitellogenin determine the  
1047 transovarial transmission of begomoviruses. *Proc. Natl. Acad. Sci. U S A*  
1048 **114**:6746-6751. 10.1073/pnas.1701720114.



- 1049 **Wu, J., and Baldwin, I.T.** (2010). New insights into plant responses to the  
1050 attack from insect herbivores. *Annu. Rev. Genet.* **44**:1-24.  
1051 10.1146/annurev-genet-102209-163500.
- 1052 **Xiao, Y., Wang, Q., Erb, M., Turlings, T.C., Ge, L., Hu, L., Li, J., Han, X.,**  
1053 **Zhang, T., Lu, J., et al.** (2012). Specific herbivore-induced volatiles defend  
1054 plants and determine insect community composition in the field. *Ecol. Lett.*  
1055 **15**:1130-1139. 10.1111/j.1461-0248.2012.01835.x.
- 1056 **Xie, X.J.** (2012). Induction of rice defense response to *Nilaparvata lugens*  
1057 (Stål) oviposition and its response to salicylic acid. Mater dissertation, Sun  
1058 Yat-sen University, Guangzhou, Guangdong.
- 1059 **Xu, J., Wang, X., Zu, H., Zeng, X., Baldwin, I.T., Lou, Y., and Li, R.** (2021).  
1060 Molecular dissection of rice phytohormone signaling involved in resistance  
1061 to a piercing-sucking herbivore. *New Phytol.* **230**:1639-1652.  
1062 10.1111/nph.17251.
- 1063 **Yamada, S., Kano, A., Tamaoki, D., Miyamoto, A., Shishido, H., Miyoshi,**  
1064 **S., Taniguchi, S., Akimitsu, K., and Gomi, K.** (2012). Involvement of  
1065 OsJAZ8 in jasmonate-induced resistance to bacterial blight in rice. *Plant Cell*  
1066 *Physiol.* **53**:2060-2072. 10.1093/pcp/pcs145.
- 1067 **Yang, J.-O., Nakayama, N., Toda, K., Tebayashi, S., and Kim, C.-S.** (2014).  
1068 Structural determination of elicitors in *Sogatella furcifera* (Horváth) that  
1069 induce Japonica rice plant varieties (*Oryza sativa* L.) to produce an ovicidal  
1070 substance against *S. furcifera* eggs. *Biosci. Biotechnol. Biochem.*

- 1071       **78**:937-942. 10.1080/09168451.2014.917266.
- 1072       **Ye, M., Kuai, P., Hu, L., Ye, M., Sun, H., Erb, M., and Lou, Y. (2020).**
- 1073       Suppression of a leucine-rich repeat receptor-like kinase enhances host
- 1074       plant resistance to a specialist herbivore. *Plant Cell Environ.* **43**:2571-2585.
- 1075       10.1111/pce.13834.
- 1076       **Ye, W., Yu, H., Jian, Y., Zeng, J., Ji, R., Chen, H., and Lou, Y. (2017).** A
- 1077       salivary EF-hand calcium-binding protein of the brown planthopper
- 1078       *Nilaparvata lugens* functions as an effector for defense responses in rice.
- 1079       *Sci. Rep.* **7**:40498. 10.1038/srep40498.
- 1080       **Yoshida, S., Forno, D.A., Cock, J.H., and Gomez, K.A. (1976).** Laboratory
- 1081       manual for physiological studies of rice. International Rice Research Institute,
- 1082       Los Baños, Philippines.
- 1083       **Yoshinaga, N., Alborn, H.T., Nakanishi, T., Suckling, D.M., Nishida, R.,**
- 1084       **Tumlinson, J.H., and Mori, N. (2010).** Fatty acid-amino acid conjugates
- 1085       diversification in lepidopteran caterpillars. *J. Chem. Ecol.* **36**:319-325.
- 1086       10.1007/s10886-010-9764-8.
- 1087       **Yuan, M., Lu, Y., Zhu, X., Wan, H., Shakeel, M., Zhan, S., Jin, B.R., and Li,**
- 1088       **J. (2014).** Selection and evaluation of potential reference genes for gene
- 1089       expression analysis in the brown planthopper, *Nilaparvata lugens*
- 1090       (Hemiptera: Delphacidae) using reverse- transcription quantitative PCR.
- 1091       *PLoS One* **9**:e86503. 10.1371/journal.pone.0086503.
- 1092       **Zhou, G., Qi, J., Ren, N., Cheng, J., Erb, M., Mao, B., and Lou, Y. (2009).**

1093 Silencing *OsHI-LOX* makes rice more susceptible to chewing herbivores, but

1094 enhances resistance to a phloem feeder. *Plant J.* **60**:638-648.

1095 [10.1111/j.1365-3113X.2009.03988.x](https://doi.org/10.1111/j.1365-3113X.2009.03988.x).

1096

1097 **Figures**

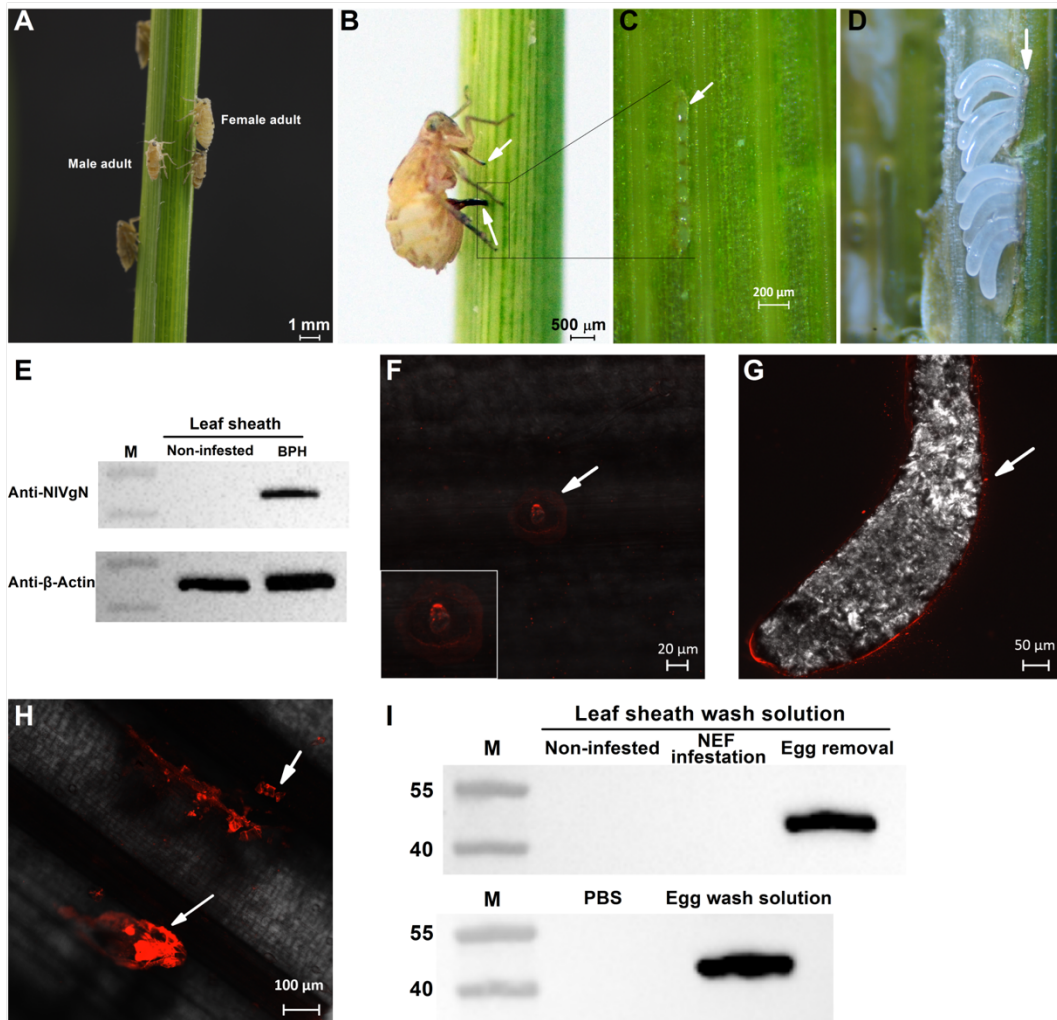

1098

1099 **Figure 1. NIVgN enters rice tissues during BPH feeding and egg**

1100 **deposition.** (A) A rice plant exposed to BPH infestation, showing male and

1101 female adults. (B) A gravid BPH female feeding (see upper arrow) and

1102 ovipositing (see lower arrow) on a rice plant. (C) BPH eggs in the rice leaf

1103 sheath with the arrow pointing out the egg caps. (D) BPH eggs are visible after

1104 the leaf sheath was removed. The upper approximately transparent part of the

1105 egg, indicated by the arrow, is the egg cap. (E) Western blot showing that

1106 NIVgN is present in rice plants that were infested for 24 h by 50

1107 newly-emerged BPH female adults, but not in non-infested plants. **(F-H)**  
1108 Immunofluorescence microscopy reveals the presence of NIVgN (indicated by  
1109 the arrow) at BPH feeding sites **(F)**, on the surface of the egg **(G)** and in egg  
1110 caps **(H)**. **(I)** Western blot showing that NIVgN is present in the PBS buffer in  
1111 which pieces of leaf sheaths that were infested by BPH gravid females but  
1112 BPH eggs were removed (Egg removal) and intact BPH eggs (Egg wash  
1113 solution) were immersed for 8-10 min and 2-3 min, respectively, but not in the  
1114 buffer in which pieces of leaf sheaths that were kept non-infested or infested  
1115 by BPH Newly Emerged Females (NEF infested) were immersed for 8-10 min  
1116 or in the buffer alone. M, molecular weight markers (kDa).  
1117

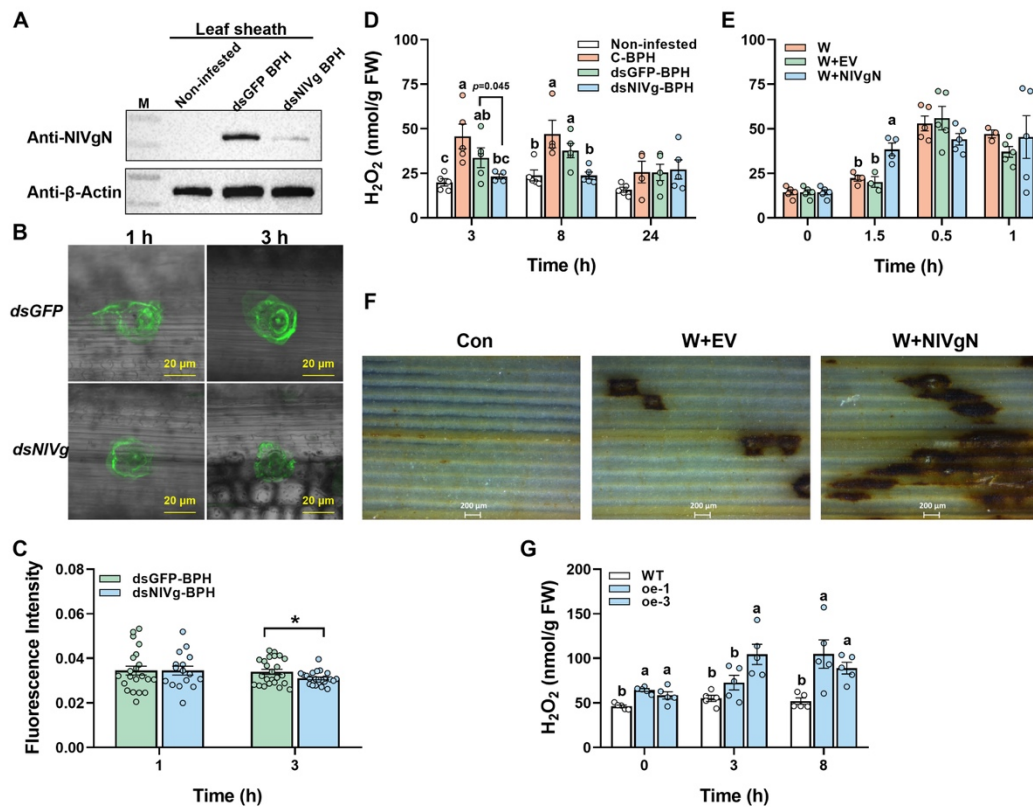

1118

1119 **Figure 2. NIVgN enhances BPH feeding-induced concentrations of**  
 1120 **cytosolic Ca<sup>2+</sup> and H<sub>2</sub>O<sub>2</sub> in rice. (A)** Detection of protein fraction NIVgN in  
 1121 rice infested for 24 h by 50 newly-emerged BPH female adults (12 to 24 h after  
 1122 emergence) that had been injected with dsRNA of *GFP* (*dsGFP*) or *NIVg*  
 1123 (*dsNIVg*) at fifth-instar nymph stage, or kept non-infested. M indicates  
 1124 molecular weight markers. **(B and C)** Confocal microscopic images showing  
 1125 green fluorescence of Fluo-3 AM binding with intracellular Ca<sup>2+</sup> at BPH feeding  
 1126 sites (indicated by the arrow) of rice leaf sheaths **(B)** and mean fluorescence  
 1127 intensity (+SE, n = 16-24) at feeding sites **(C)** that were infested for 1 and 3 h  
 1128 by newly-emerged female adults that had been injected with *dsGFP* or *dsNIVg*  
 1129 at fifth-instar nymph stage. Asterisk indicates significant difference between

1130 treatments ( $*P < 0.05$ , Student's *t*-test). **(D)** Mean levels (+SE,  $n = 5$ ) of  $H_2O_2$  in  
1131 leaf sheaths of TN1 plants that were kept non-infested (Non-infested) or  
1132 infested for 3, 8 and 24 h by newly-emerged BPH female adults that had been  
1133 injected with *dsGFP*, *dsNIVg* or kept non-injected (C-BPH) at fifth-instar nymph  
1134 stage. **(E)** Mean levels (+SE,  $n = 5$ ) of  $H_2O_2$  in leaf sheaths of TN1 plants that  
1135 were kept unmanipulated (0 h) or treated for 0.5, 1 and 3 h with wounding plus  
1136 the purified recombinant protein NIVgN (W+NIVgN), the purified products of  
1137 the empty vector (EV) (W+EV) or nothing. **(F)** In situ detected  $H_2O_2$   
1138 accumulation in rice leaves by 3,3'-diaminobenzidine (DAB) staining. Plant  
1139 leaves were kept unmanipulated (Con) or treated for 15 min with W+EV or  
1140 W+NIVgN. **(G)** Mean levels (+SE,  $n = 5$ ) of  $H_2O_2$  in XS11 plants expressing  
1141 *NIVgN* (line *oe-1* and *oe-3*) and wild-type (WT) plants that were kept  
1142 non-infested or infested with 10 gravid BPH female adults for 3, 8 and 24 h.  
1143 FW, fresh weight. Letters indicate significant differences among different  
1144 treatments ( $P < 0.05$ , Tukey's HSD post-hoc test).  
1145

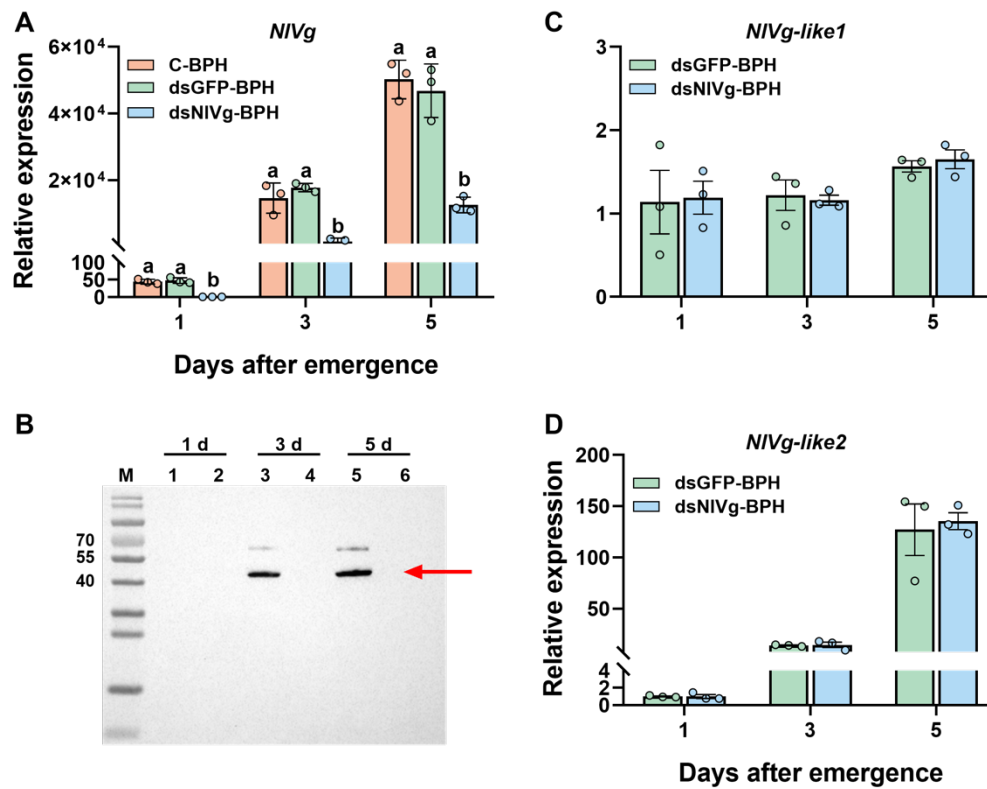

1146

1147 **Figure 2—figure supplement 1. Silencing efficiency of *NIVg* by RNAi, and**  
1148 **the effect of knocking down of *NIVg* on transcript levels of *NIVg-like1* and**  
1149 ***NIVg-like2*.**

1150 **(A)** Mean transcript levels (+SE, n = 3) of *NIVg* in whole bodies of 1-, 3- and  
1151 5-day-old BPH female adults 2, 4 and 6 d, respectively, after they were injected  
1152 with dsRNA of *GFP* (*dsGFP*) or *NIVg* (*dsNIVg*), or kept non-injected (C-BPH)  
1153 at fifth-instar nymph stage. Letters indicate significant differences among  
1154 different treatments ( $P < 0.05$ , Tukey's HSD post-hoc test).

1155 **(B)** Western blot analysis of NIVgN in proteins extracted from whole bodies of  
1156 1-, 3- and 5-day-old BPH female adults 2, 4 and 6 d, respectively, after they  
1157 were injected with *dsGFP* (lanes 1, 3 and 5) or *dsNIVg* (lanes 2, 4 and 6) at



1158 fifth-instar nymph stage. M, molecular weight markers (kDa).  
1159 (C and D) Mean transcript levels (+SE, n = 3) of *NIVg-like1* (C) and *NIVg-like2*  
1160 (D) in whole bodies of 1-, 3- and 5-day-old BPH female adults 2, 4 and 6 d,  
1161 respectively, after they were injected with *dsGFP* or *dsNIVg* at fifth-instar  
1162 nymph stage. Differences between treatments at each time point are not  
1163 significant ( $P > 0.05$ ).  
1164

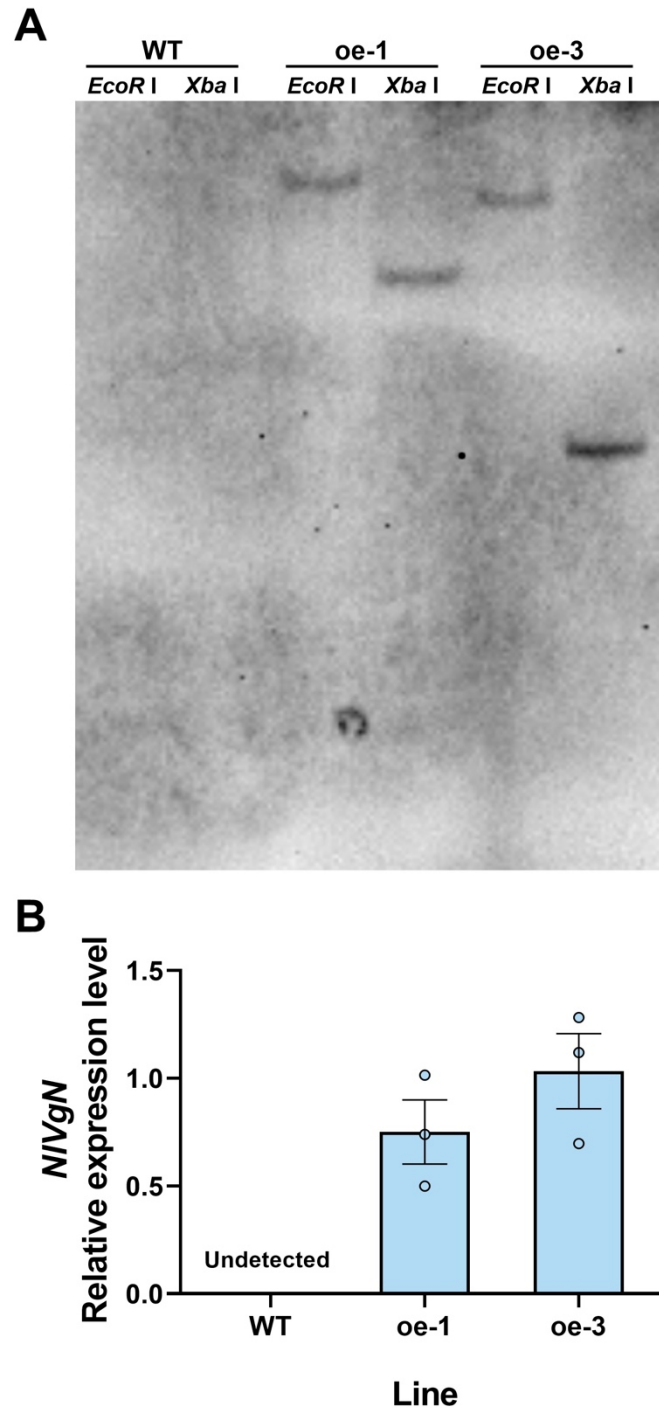

1165

1166 **Figure 2—figure supplement 2. DNA gel-blot analysis and expression**  
1167 **levels of *NIVgN* in transgenic (oe-1, oe-3) and wild-type (WT) plants.**

1168 **(A)** Genomic DNA was digested with EcoRI and XbaI. The blot was hybridized

1169 with a probe specific for reporter gene *GUS* as *GUS* was inserted into the plant

1170 genome together with the target gene. The DNA-hybridized band of *oe-1* and  
 1171 *oe-3* means a single insertion by southern blotting. **(B)** Mean transcript levels  
 1172 (+SE, n = 3) of *NIVgN* in *oe-1*, *oe-3*, and WT plants that were kept  
 1173 unmanipulated.

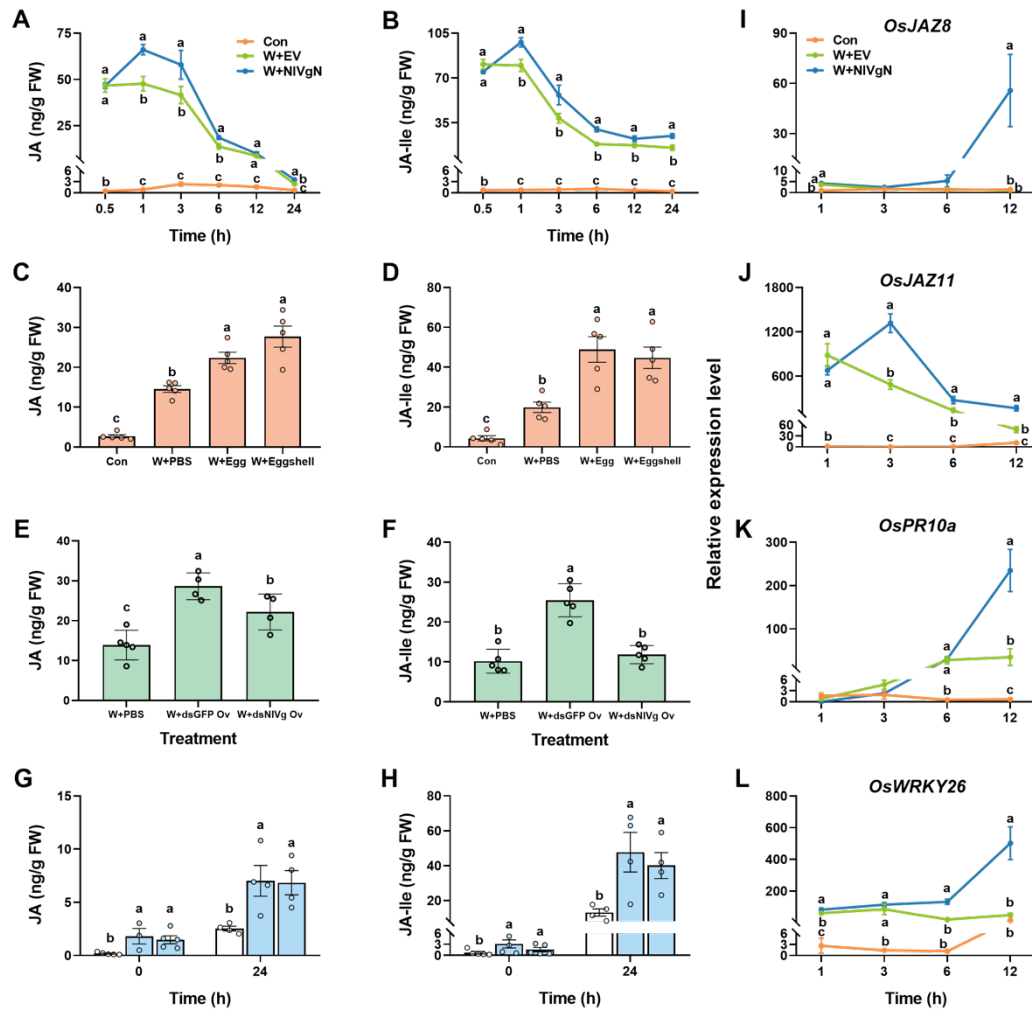

1174

1175 **Figure 3. NIVgN elicits the production of JA and JA-Ile and the**  
 1176 **expression of defense-related genes in rice. (A and B)** Mean levels (+SE, n  
 1177 = 5) of JA **(A)** and JA-Ile **(B)** in rice leaf sheaths that were kept unmanipulated  
 1178 (Con) or treated for 0.5, 1, 3, 6, 12 and 24 h with wounding plus the purified  
 1179 products of the empty vector (EV) (W+EV) or the purified recombinant protein

1180 NIVgN (W+NIVgN). (**C** and **D**) Mean levels (+SE, n = 5) of JA (**C**) and JA-Ile (**D**)  
1181 in rice leaf sheaths that were kept unmanipulated (Con) or treated for 3 h with  
1182 wounding plus the phosphate buffered saline (PBS) (W+PBS) or the solution  
1183 of homogenized BPH eggs (W+Egg) or eggshells (W+Eggshell) in the buffer.  
1184 (**E** and **F**) Mean levels (+SE, n = 5) of JA (**E**) and JA-Ile (**F**) in rice leaf sheaths  
1185 that were treated for 3 h with wounding plus the PBS or the solution of  
1186 homogenized ovaries of BPH female adults (4 d after emergence) that were  
1187 injected with dsRNA of *GFP* (*dsGFP*) (W+dsGFP Ov) or *NIVg* (*dsNIVg*)  
1188 (W+dsNIVg Ov) at fifth-instar nymph stage. (**G** and **H**) Mean levels (+SE, n = 5)  
1189 of JA (**G**) and JA-Ile (**H**) in WT plants and plants expressing *NIVgN* (line oe-1  
1190 and oe-3) that were kept non-infested (0 h) or infested with 10 gravid BPH  
1191 female adults for 24 h. (**I-L**) Mean transcript levels (+SE, n = 5) of *OsJAZ8* (**I**),  
1192 *OsJAZ11* (**J**), *OsPR10a* (**K**) and *OsWRKY26* (**L**), in rice leaf sheaths that were  
1193 kept unmanipulated (Con) or treated for 1, 3, 6, and 12 with W+EV or  
1194 W+NIVgN. FW, fresh weight. Letters indicate significant differences among  
1195 different treatments ( $P < 0.05$ , Tukey's HSD post-hoc test).

1196

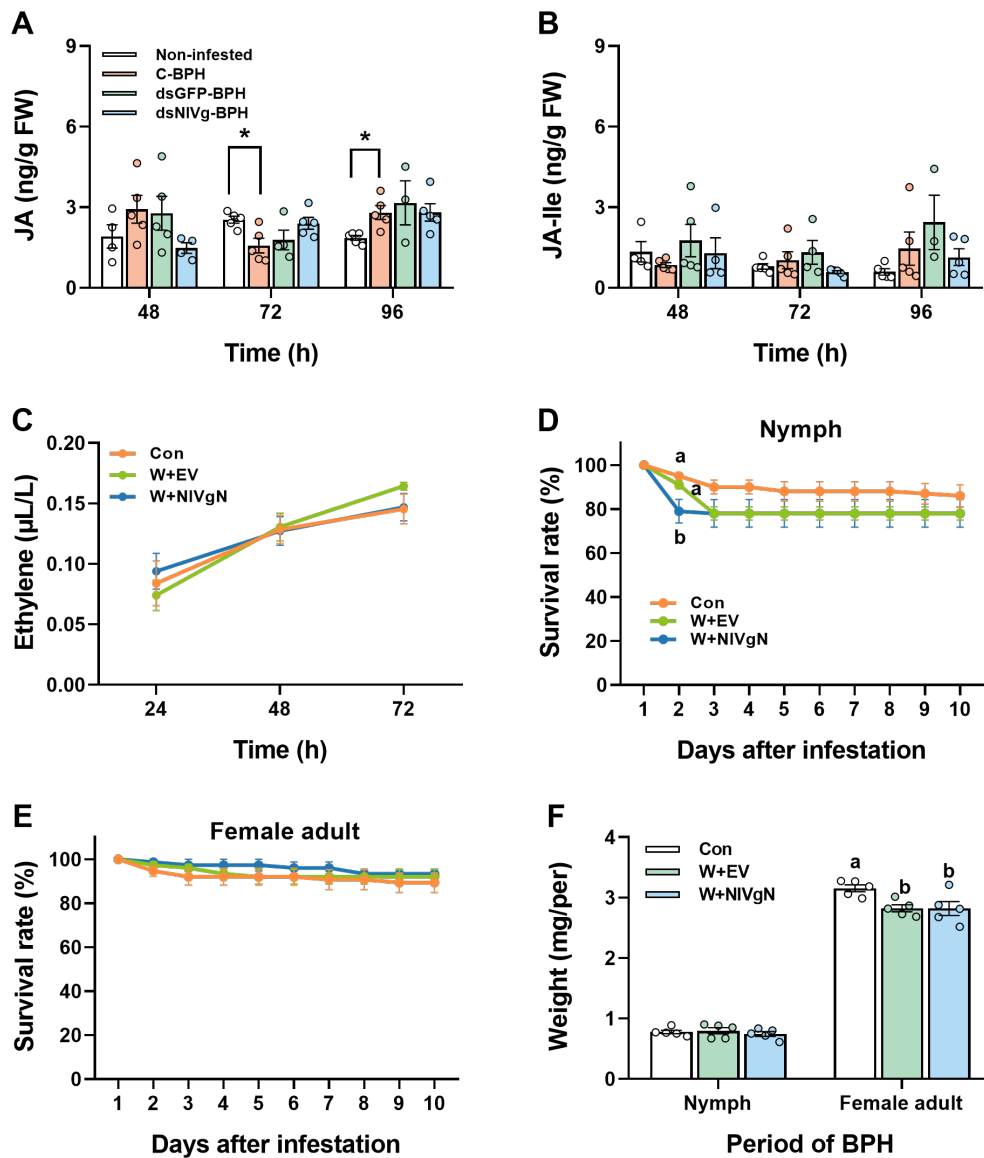

1197

1198 **Figure 3—figure supplement 1. Effects of NIVgN secreted from BPH**  
 1199 **feeding or recombinant NIVgN protein on the production of JA, JA-Ile, or**  
 1200 **ethylene in rice, and on the survival and mass of BPH.**

1201 (A and B) Mean levels (+SE, n = 5) of JA (A) and JA-Ile (B) in rice leaf sheaths  
 1202 that were kept insect-free (Non-infested) or individually infested by newly  
 1203 emerged BPH female adults which were injected with dsRNA of *GFP* (*dsGFP*),

1204 *NIVg* (*dsNIVg*) or kept noninjected (C-BPH) for 48, 72 and 96 h. Differences in  
1205 the level of JA and JA-Ile between treatments at each time point are not  
1206 significant (ANOVA,  $P > 0.05$ ). Asterisks indicate significant differences  
1207 between two treatments ( $*P < 0.05$ , Student's *t*-test).

1208 **(C)** Mean levels ( $\pm$ SE,  $n = 8$ ) of ethylene emitted from rice plants that were  
1209 kept unmanipulated (Con) or treated with wounding plus the purified products  
1210 of the empty vector (EV) (W+EV) or the purified recombinant protein NIVgN  
1211 (W+NIVgN). Differences between treatments at each time point are not  
1212 significant (ANOVA,  $P > 0.05$ ).

1213 **(D and E)** Mean survival rates ( $\pm$ SE,  $n = 5$ ) of newly hatched BPH nymphs **(D)**  
1214 and of newly emerged female adults **(E)** 1-10 d after feeding on rice plants that  
1215 were kept unmanipulated (Con) or treated with W+EV or W+NIVgN.

1216 **(F)** Mean mass ( $\pm$ SE,  $n = 5$ ) of BPHs 10 d after feeding on rice plants that were  
1217 kept unmanipulated (Con) or treated with W+EV or W+NIVgN. Letters indicate  
1218 significant differences among different treatments ( $P < 0.05$ , Tukey's HSD  
1219 post-hoc test).

1220

1221

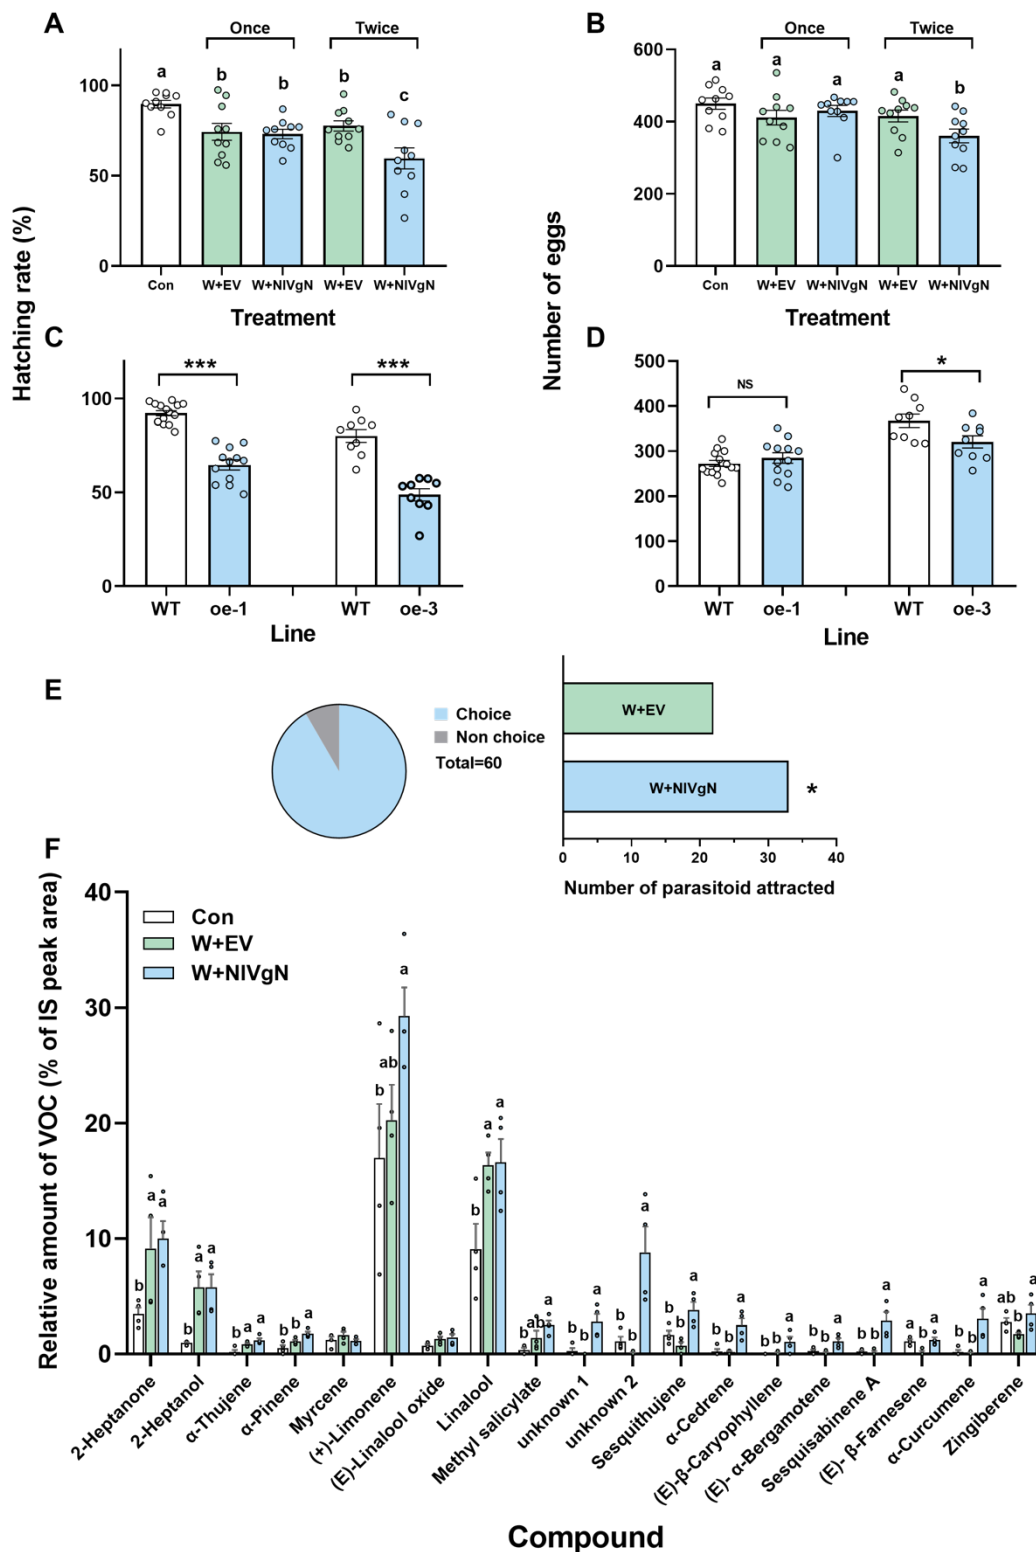

1222

1223 **Figure 4. NIVgN induces direct and indirect defenses of rice against BPH.**

1224 (A-D) Mean hatching rate (+SE, n = 9-15) of BPH eggs (A and C) and mean

1225 number (+SE, n = 9-15) of eggs laid by gravid BPH females for 24 h (**B** and **D**)  
1226 on plants that were kept unmanipulated (Con), treated with wounding plus the  
1227 purified products of the empty vector (EV) (W+EV) or the purified recombinant  
1228 protein NIVgN (W+NIVgN), or expressed with *NIVgN* (line *oe-1* and *oe-3*) or  
1229 not (wild-type, WT). Once and twice indicate that plants were treated with  
1230 W+EV or W+NIVgN one time and two times, respectively. The experiments on  
1231 the hatching rate of BPH eggs on WT plants versus one of the two transgenic  
1232 lines, *oe-1* and *oe-3*, were performed separately. Asterisk indicates significant  
1233 differences between different treatments ( $*P < 0.05$ ;  $***P < 0.001$ ; Student's  
1234 *t*-test). (**E**) Number of *A. nilaparvatae* female adults attracted by volatiles  
1235 emitted from rice plants treated with W+EV or W+NIVgN. Asterisk indicates  
1236 significant differences between different treatments ( $*P < 0.05$ , chi-squared  
1237 test). (**F**) Mean amount (% of IS peak area, +SE, n = 4) of volatiles emitted  
1238 from rice plants that were kept unmanipulated (Con) or treated with W+EV or  
1239 W+NIVgN. Letters indicate significant differences among different treatments  
1240 ( $P < 0.05$ , Tukey's HSD post-hoc test).

1241

1242



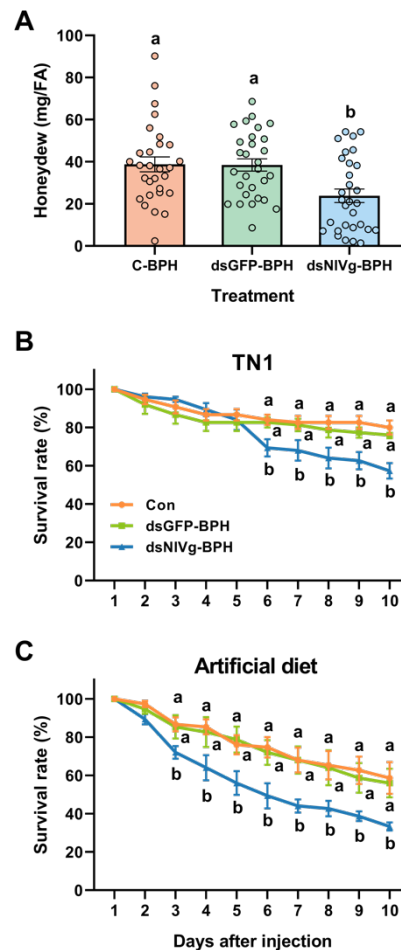

1243

1244 **Figure 5. Knockdown of *NIVg* impairs the feeding capacity and survival**

1245 **of BPH female adults. (A) Mean amount of honeydew per day (+SE, n = 30)**

1246 **secreted by a newly-emerged BPH female adult (FA, 12-24 h after emergence)**

1247 **that was injected with dsRNA of *GFP* (*dsGFP*) or *NIVg* (*dsNIVg*), or kept**

1248 **non-injected (C-BPH) at fifth-instar nymph stage. (B and C) Mean survival**

1249 **rates (+SE, n = 5) of newly-emerged BPH female adults that were injected with**

1250 ***dsGFP*, *dsNIVg* or kept non-injected (C-BPH) at fifth-instar nymph stage, 1-10**

1251 **d (2-11 d post injection) after they fed on rice variety TN1 (B) or artificial diet**

1252 **(C). Letters indicate significant differences among treatments ( $P < 0.05$ ,**

1253 **Tukey's HSD post-hoc test).**

1254

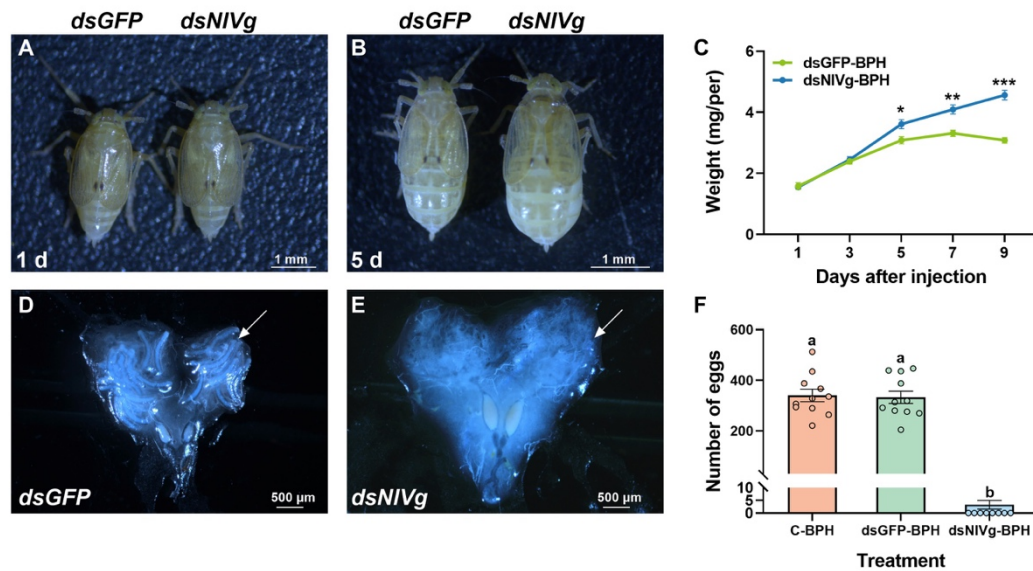

1255

1256 **Figure 5—figure supplement 1. Knockdown of *NIVg* impairs the**  
1257 **development and fecundity of BPH female adult.**

1258 (A and B) The growth phenotypes of 1- (A) and 5-d-old female adults (B) at 2  
1259 and 6 d after they were injected with dsRNA of *GFP* (*dsGFP*) or *NIVg* (*dsNIVg*)  
1260 at fifth-instar nymph stage.

1261 (C) Mean mass ( $\pm$ SE, n = 3-9) of individual 1-, 3-, 5-, 7- and 9-d-old female  
1262 BPH adults at 2, 4, 6, 8 and 10 d after they were injected with *dsGFP* or  
1263 *dsNIVg* at fifth-instar nymph stage. Asterisks indicate significant differences  
1264 between different treatments (\* $P$  < 0.05, \*\* $P$  < 0.01, \*\*\* $P$  < 0.001, Student's  
1265 *t*-test).

1266 (D and E) The ovarian phenotypes of 5-d-old-female adults at 6 d after they  
1267 were injected with *dsGFP* (D) or *dsNIVg* (E) at fifth-instar nymph stage.

1268 (F) Mean number of eggs (+SE, n = 11) on rice plants laid for 10 d by a female  
1269 adult that was injected with *dsGFP* or *dsNIVg*, or kept non-injected (C-BPH) at

1270 fifth-instar nymph stage. Letters indicate significant differences among

1271 treatments ( $P < 0.05$ , Tukey's HSD post-hoc test).

1272

1273

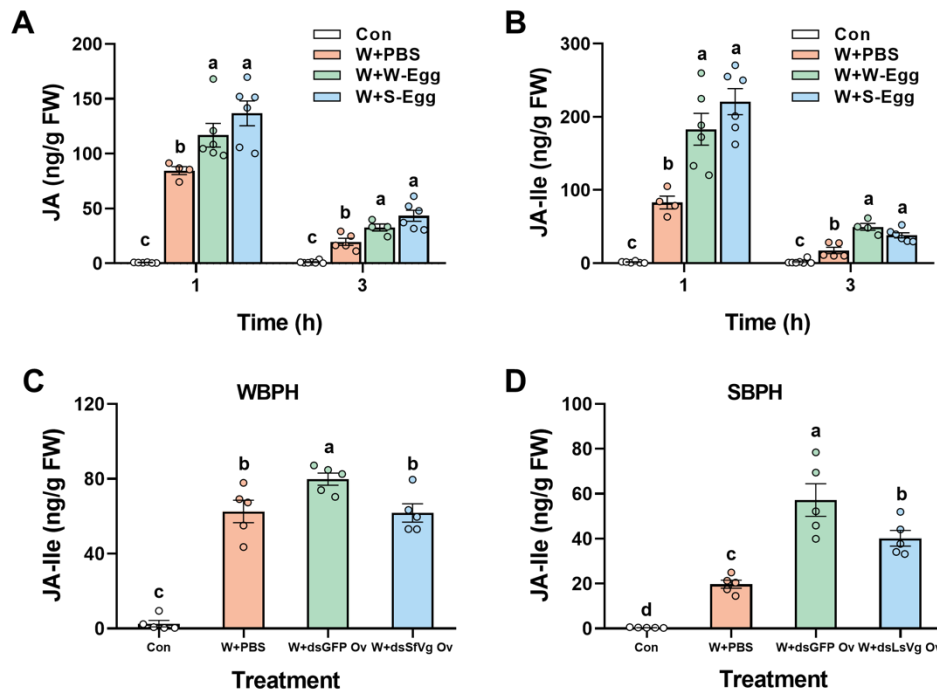

1274

1275 **Figure 6. VgN in WBPH and SBPH also elicits the production of JA and**

1276 **JA-Ile. (A and B)** Mean levels (+SE, n = 4-7) of JA (A) and JA-Ile (B) in rice

1277 leaf sheaths that were kept unmanipulated (Con) or treated with wounding plus

1278 the phosphate buffered saline (PBS) (W+PBS) or the solution of the

1279 homogenized WBPH eggs (W+W-Egg) or SBPH eggs (W+S-Egg) (for 1 and 3

1280 h). (C and D) Mean levels (+SE, n = 5) of JA-Ile in rice leaf sheaths that were

1281 kept unmanipulated (Con) or treated for 1 h with W+PBS or the solution of

1282 homogenized ovaries of WBPH (C) or SBPH (D) female adults (4 d after

1283 emergence) that were injected with dsRNA of *GFP* (dsGFP Ov),

1284 *SfVg* (dsSfVg Ov) or *LsVg* (dsLsVg Ov),

1285 respectively, at fifth-instar nymph stage. FW, fresh weight. Letters indicate

1286 significant differences among different treatments ( $P < 0.05$ , Tukey's HSD

1287 post-hoc test).

1288

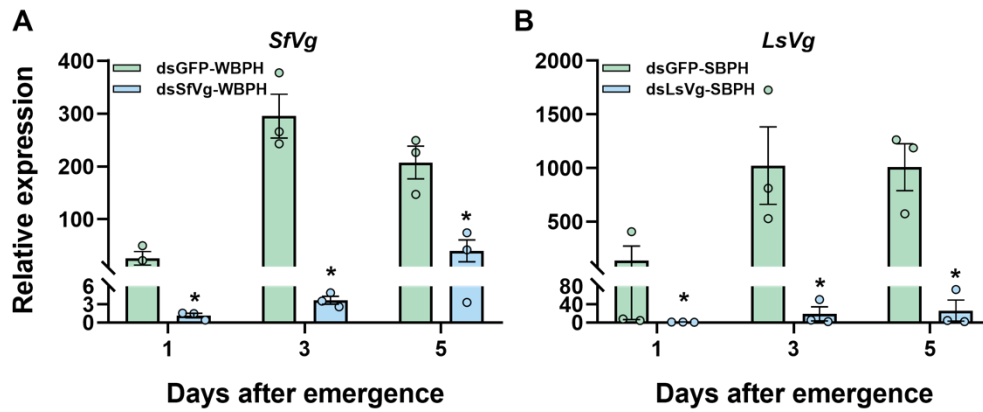

1289

1290 **Figure 6—figure supplement 1. Silencing efficiency of *SfVg* and *LsVg* by**  
1291 **RNAi in transcript levels.**

1292 Mean transcript levels (+SE, n = 3) of *SfVg* (**A**) and *LsVg* (**B**) in whole bodies of  
1293 1-, 3- and 5-d-old female adults 2, 4 and 6 d after they were injected with  
1294 dsRNA of *GFP* (*dsGFP*), *SfVg* (*dsSfVg*) or *LsVg* (*dsLsVg*) at fifth-instar nymph  
1295 stage. Asterisks indicate significant differences between different treatments  
1296 (\* $P < 0.05$ , Student's *t*-test).

1297

CLUSTAL O(1.2.4) multiple sequence alignment

```

N1VgN   SG SGPWNSNQYRYHVQGRSLSAMHQSG SNQYVGMHLRAELEWEAKNENQAVFK ISKA EY 60
SfVgN   SGNPWNNSNQLYHYRVQGRITLSAMHQAG SPQMVG IHKADLSVQAKNENQAVFK ISNAQY 60
LsVgN   SG SGPWNSNQLYHYRVQGRITLSAVQQAG APQYVGMHMKAEVSVAAKNENQAVFK ISNAQY 60
      **.****** *:*****:*****:***: * **:*:*. * *****:***
N1VgN   ADVHQNLSGGWQQLR.SNELQYKQLPLSQANQVFQVNYKQGAVRSLQVNRNTPTWELNMI 120
SfVgN   ADVHQNL TGGWQQLR.SNELQYKQLPLSQANQAFEVNYKQGSVRSLQVNRNTPTWELNMI 120
LsVgN   ADVHQNL TEGWQQLR.SNELQYKQLPLSQANQAFEVNYKQGSVRSLQVNRNTPTWELNMI 120
      *****: *****:*****.*:*****:*****:*****
N1VgN   KGFVSLFQVDVTGQNAIK SRRNIVPNG---QQVSGSFKVMED SVTGKCEHYDDELPMR 177
SfVgN   KGFVSLFQVDVTGQNVIK SRRNIVPNS---NQVSGSFKAMED SVTGKCEHYVDL LPMR 177
LsVgN   KGIVSLFQVDVTGQNAIK SRRN ILPQSD SNQVSGSFKAMED SVTGKCEHYDDELPMR 180
      **.******. *****:*. :*****.***** *****
N1VgN   VVQQHPEIAPLAVKQQGQGGQSHSRLIQVVK SRNF SNCDNPVTYHFGFTQE SNFEPASN 237
SfVgN   VVQEHPEIAPFAVHQQQ---QQLHNLIQVVK SRNF SNCDNPVTYHFGFTQE TNWEPASN 233
LsVgN   VVQQHPEIAPLAVQNSN---QQHQR.IIQVVK SRNF SNCDNPVTYHFGFTQE TDWEPASN 236
      **.******:***:. * .:*****:*****:*****
N1VgN   QMGMLVSRAAVGR IIAEEPDSYTIHSSVTQNEIAI SPFG YNQKQGVVGTLMNA TLVSVS 297
SfVgN   QMGMLVNRAS TSRI IL SGQPNSFT IQSSVTQNEIAI SPFG YNQKQGVVGTLMNA TLVSMS 293
LsVgN   QMGMLVNRAS TSRVIL SGQPNSFT IQSSVTQNEI SI SPFG YNKQKGVVGTLMNA TLVSMS 296
      *****.*:..*:*: :*:***:*****:*****:*****:*****
N1VgN   HASSGSPQSVQNPQKINDLVYEFNPASNSESNQ---RSSHYTRQQADNEDDSSSSSSSS 353
SfVgN   HA-SGSPQSVQNAQKINDLVYEFNPASNDNNGANNRR.SSNYMRQNDND-SSSSSSS--- 348
LsVgN   HA-SGSPQSVQNPQKINDLVYEFNPASNENNAANR-RSSQSMRQNDAD-DSSSSSS--- 350
      ** ***** *****:..* ***: .** : ..*****
N1VgN   DSSSSSSSSSSSSSSSSEENNKNSKKN---IKKNWNKNQKKNNNNNNRNNHND 408
SfVgN   -SSSS-SSSDSSSSSSSSEENYNKNGKNNNNNNGKNNNWNKNNNNKWNNDDDNNRY 406
LsVgN   -SSSSDSSSSSSSSSSEENNKNGKN---NNNNWNKNKR---NDEDNKRH 397
      ***** **.******.*: ***.*: :****:.. *::*:
N1VgN   NDNNDNSNENND DAYWRSQQKTKFRSRR 438
SfVgN   NSNNRHQNDND DAYWRSQQKTKFRSRR 436
LsVgN   NSNDNRQANDND DSYL RNQQKTKFRSRR 427
      *.*:.. :***:* *.* *****

```

1298

1299 **Figure 6—figure supplement 2. Multiple alignment of N-terminal subunit**

1300 **amino acid sequences of Vgs of three planthoppers.**

1301 \*, identical amino acid; :, conserved substitution; ., semiconserved substitution.

1302

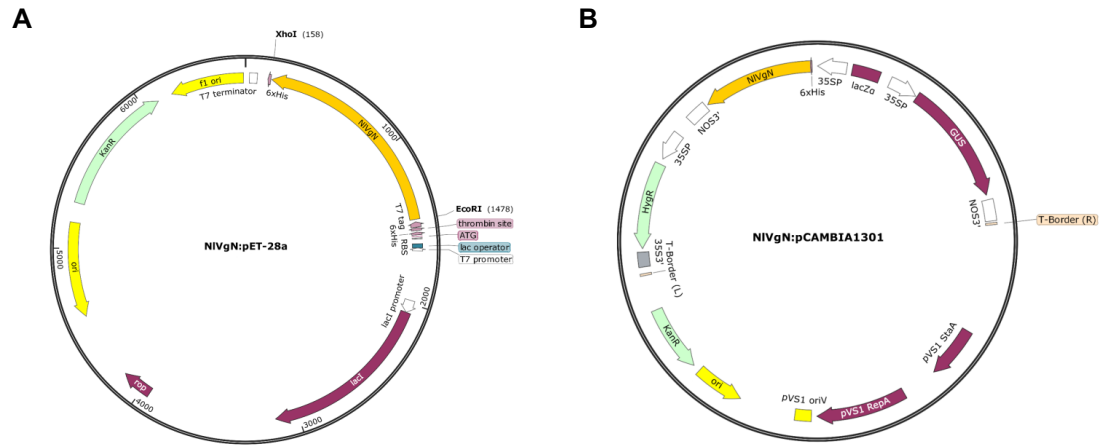

**Supplementary file 3. Transformation vectors used for prokaryotic expression of NIVgN or generation of lines expressing NIVgN.**
